1 Title:

2 **Knowledge, uptake and intention to use antibiotic post-exposure prophylaxis and**  
3 **meningococcal B vaccine (4CMenB) for gonorrhoea among a large, online community sample of**  
4 **gay, bisexual and other men who have sex with men in the UK**

5 Authors:

6 Dana Ogaz ([dana.ogaz@ukhsa.gov.uk](mailto:dana.ogaz@ukhsa.gov.uk), ORCID ID: 0000-0002-1900-8892) <sup>1,2</sup>  
7 Jessica Edney ([jessica.edney@ukhsa.gov.uk](mailto:jessica.edney@ukhsa.gov.uk), ORCID ID: 0009-0003-9920-1848) <sup>1</sup>  
8 Dawn Phillips ([dawn.phillips@ukhsa.gov.uk](mailto:dawn.phillips@ukhsa.gov.uk), ORCID ID: 0009-0001-1508-1697) <sup>1</sup>  
9 Dolores Mullen ([dolores.mullen@ukhsa.gov.uk](mailto:dolores.mullen@ukhsa.gov.uk), ORCID ID: 0009-0006-1741-1449) <sup>1</sup>  
10 David Reid ([david.reid@ucl.ac.uk](mailto:david.reid@ucl.ac.uk), ORCID ID: 0000-0001-6832-2418) <sup>2,3</sup>  
11 Ruth Wilkie ([ruth.wilkie@wales.nhs.uk](mailto:ruth.wilkie@wales.nhs.uk), ORCID ID: 0009-0000-9568-1862) <sup>1</sup>  
12 Erna Buitendam ([erna.buitendam@ukhsa.gov.uk](mailto:erna.buitendam@ukhsa.gov.uk), ORCID ID: 0000-0002-4612-7408) <sup>1</sup>  
13 James Bell ([james.bell@ukhsa.gov.uk](mailto:james.bell@ukhsa.gov.uk), ORCID ID: 0000-0002-2265-1205) <sup>1,2</sup>  
14 Catherine M Lowndes ([kathy.lowndes@ukhsa.gov.uk](mailto:kathy.lowndes@ukhsa.gov.uk), ORCID ID: 0009-0000-9171-9149) <sup>1</sup>  
15 Gwenda Hughes ([gwenda.hughes@lshtm.ac.uk](mailto:gwenda.hughes@lshtm.ac.uk), ORCID ID: 0000-0003-2090-7702) <sup>4</sup>  
16 Helen Fifer ([helen.fifer@ukhsa.gov.uk](mailto:helen.fifer@ukhsa.gov.uk), ORCID ID 0000-0001-7756-403X) <sup>1</sup>  
17 Catherine H Mercer ([c.mercer@ucl.ac.uk](mailto:c.mercer@ucl.ac.uk), ORCID ID: 0000-0002-4220-5034) <sup>2,3</sup>  
18 John Saunders ([john.saunders@uksa.gov.uk](mailto:john.saunders@uksa.gov.uk), ORCID ID: 0000-0003-3020-9916) <sup>1,2</sup>  
19 Hamish Mohammed ([hamish.mohammed@ukhsa.gov.uk](mailto:hamish.mohammed@ukhsa.gov.uk), ORCID ID: 0000-0002-2060-7286) <sup>1,2</sup>

20 Affiliations: <sup>1</sup> Blood Safety, Hepatitis, STI & HIV Division, UK Health Security Agency, London,  
21 United Kingdom <sup>2</sup> The National Institute for Health Research Health Protection Research Unit in  
22 Blood Borne and Sexually Transmitted Infections at University College London in partnership with  
23 the UK Health Security Agency, London, United Kingdom <sup>3</sup> Institute for Global Health, University  
24 College London, London, United Kingdom <sup>4</sup> UK Public Health Rapid Support Team, London School  
25 of Hygiene & Tropical Medicine, London, United Kingdom

26

NOTE: This preprint reports new research that has not been certified by peer review and should not be used to guide clinical practice.

27 **Corresponding author:**

28 Dana Ogaz (dana.ogaz@ukhsa.gov.uk)

29 UK Health Security Agency, 61 Colindale Ave, London, UK, NW9 5EQ

30 **Abstract:**

31 **Introduction:** Novel STI prevention interventions, including doxycycline post-exposure prophylaxis  
32 (doxyPEP) and meningococcal B vaccination (4CMenB) against gonorrhoea, have been increasingly  
33 examined as tools to aid STI control. There is emerging evidence of the efficacy of doxyPEP in  
34 preventing bacterial STIs; however limited data exist on the extent of use in the UK. We examined  
35 self-reported knowledge and use of antibiotic post-exposure prophylaxis (PEP), and intention to use  
36 (ITU) doxyPEP and 4CMenB among a large, community sample of gay, bisexual and other men who  
37 have sex with men (GBMSM) in the UK.

38 **Methods:** Using data collected by the RiISH survey (November/December 2023), part of a series of  
39 online surveys of GBMSM in the UK, we describe (% , [95% CI]) self-reported knowledge and use of  
40 antibiotic PEP (including doxyPEP) and doxyPEP and 4CMenB ITU. Using bivariate and  
41 multivariable logistic regression, we examined correlates of ever using antibiotic PEP, doxyPEP ITU,  
42 and 4CMenB ITU, respectively, adjusting for sociodemographic characteristics and a composite  
43 marker of sexual risk defined as reporting (in the last three months):  $\geq 5$  condomless anal sex partners,  
44 bacterial STI diagnosis, chemsex, and/or meeting partners at sex-on-premises venues, sex parties, or  
45 cruising locations.

46 **Results:** Of 1,106 participants (median age: 44 years [IQR: 34-54]), 34% (30%-37%) knew of  
47 antibiotic PEP; 8% (6%-10%) ever reported antibiotic PEP use. Among those who did, most reported  
48 use in the last year (84%, 73/87) and exclusively used doxycycline (69%, 60/87). Over half of  
49 participants reported doxyPEP ITU (51% [47%-56%]) while over two-thirds (64% [60%-69%])  
50 reported 4CMenB ITU. GBMSM with markers of sexual risk and with uptake of other preventative  
51 interventions were more likely to report ever using antibiotic PEP as well as doxyPEP and 4CMenB  
52 ITU, respectively. HIV-PrEP users and people living with HIV (PLWHIV) were more likely to report  
53 STI prophylaxis use and ITU than HIV-negative GBMSM not reporting recent HIV-PrEP use.

54 **Discussion:** There were high levels of intended use of novel STI prevention interventions. Fewer than  
55 one in ten GBMSM had reported ever using antibiotic PEP, with usage more common among those at  
56 greater risk of STIs. Future guidelines and health promotion for 4CMenB and antibiotic PEP must be  
57 carefully crafted alongside clinical experts and community partners, given intervention complexity  
58 and the risk of presenting conflicting public health messages regarding antimicrobial stewardship.

## 59 Introduction

60 There have been continued and unprecedented increases in bacterial sexually transmitted infections  
61 (STIs) (e.g., chlamydia, gonorrhoea, syphilis) among gay, bisexual, and other men who have sex with  
62 men (GBMSM) in the UK since the early 2000s (1, 2). There has been sustained progress towards  
63 HIV elimination through combination prevention interventions, including HIV-PrEP, HIV testing, and  
64 Treatment as Prevention (TasP) (3), but controlling transmission of other STIs remains challenging.  
65 Novel STI prevention interventions have been increasingly considered to aid STI control in key  
66 populations but advocacy for the use of biomedical interventions, including antibiotic prophylaxis and  
67 meningococcal B vaccination (4CMenB) for GBMSM, has been mixed. Concerns with widespread  
68 implementation include the potential effects on antimicrobial resistance (AMR) selection as well as  
69 individual sexual risk perception and resultant behavioural risk compensation (4-6). In the UK,  
70 elimination of the 2022 mpox outbreak was jointly achieved with co-produced community messaging  
71 and individual-level behavioural change, alongside a targeted vaccination programme. This  
72 underlined the importance of a community supported response (7) and rapid deployment interventions  
73 as part of a cadre of combination prevention tools (8). However, similar approaches for bacterial STI  
74 control have been less effective (9), which highlights a need to consider new and novel prevention  
75 interventions as part of modern control measures.

76 The use of self-sourced antibiotics as pre- and post-exposure prophylaxis for STI prevention has been  
77 reported in UK GBMSM from as early as 2019 (10, 11), with uptake estimates of 3.6% across a  
78 community sample of GBMSM in 2020/2021 (12). Recent studies have shown a reduction in bacterial  
79 STI incidence in GBMSM using doxycycline post-exposure prophylaxis (doxyPEP) (13-17), and a  
80 guideline for doxyPEP use in the UK is under development.

81 Observational studies of 4CMenB vaccination for *Neisseria meningitidis* serogroup B bacteria have  
82 shown cross-protection against *Neisseria gonorrhoeae* (gonorrhoea) (18). Modelling suggests  
83 vaccination for GBMSM at risk can be a cost-effective strategy with significant impact on gonorrhoea  
84 incidence, while also conferring community-level benefits that could curb incidence, even within  
85 conservative efficacy estimates (19). Real-world effectiveness of 4CMenB has shown a reduction in  
86 gonorrhoea incidence of between 22%-47% (14, 20-23). More recently, recommendations of a  
87 gonorrhoea vaccination programme using 4CMenB vaccine, primarily (not exclusively) targeting  
88 GBMSM, have been made by the UK's Joint Committee on Vaccination and Immunisation (JCVI)  
89 (24).

90 At the time of writing this article, doxyPEP and 4CMenB vaccination are not yet recommended for  
91 STI prevention in the UK. However, in preparation for potential use of these novel STI interventions  
92 across SHS, we explored data from the most recent round of a serial, cross-sectional survey of  
93 GBMSM in the UK to examine self-reported knowledge, uptake, and regimens used as antibiotic

94 post-exposure prophylaxis (PEP) for STI prevention. To gauge community interest in these novel STI  
95 preventative interventions, we also explored the intention to use doxyPEP and 4CMenB assuming  
96 availability, efficacy, and recommendation in the UK.

## 97 **Methods**

### 98 **Study population and data collection**

99 We used data collected from the most recent round (November/December 2023) of the ‘Reducing  
100 inequalities in Sexual Health’ (RiiSH) surveys: a series of cross-sectional surveys examining the  
101 sexual health and well-being of a community sample of GBMSM in the UK. Methods for RiiSH 2023  
102 were adapted from previous study rounds (25, 26). Stakeholder engagement with UK community  
103 groups prior to implementation was undertaken to review core questions and inform question  
104 additions for the 2023 round.

105 Participants were recruited from 7th November-6th December 2023 through social networking sites  
106 (Facebook, Instagram, X) and a geospatial dating application (Grindr). An additional survey link was  
107 created for dissemination by voluntary and community networks which was cascaded via social  
108 networking sites (hereafter, community-cascaded link). Due to survey hosting limitations, online  
109 click-throughs were not captured.

110 GBMSM included in analyses were self-identifying men (cisgender/transgender), transgender women,  
111 or gender-diverse individuals assigned male at birth (AMAB), aged  $\geq 16$  years, resident in the UK and  
112 reporting sex with a man in the last year. We obtained online consent and there was no incentive to  
113 participate.

114 Data was collected using the Snap Surveys platform ([www.snapsurveys.com](http://www.snapsurveys.com)). Data management and  
115 analysis was conducted using Stata 17.0 (StataCorp LLC). Ethical approval for this study was granted  
116 by the UKHSA Research and Ethics Governance Group (REGG; ref: R&D 524).

### 117 **Knowledge and use of antibiotics after sex for STI prevention**

118 We calculated the percentage (%) and 95% confidence intervals (95% CI) of GBMSM having ever  
119 heard of using antibiotic PEP (‘Before taking this survey, had you heard about using antibiotics  
120 immediately after sex to prevent STIs other than HIV [e.g., doxy PEP]?’) and those that reported use  
121 (‘Have you ever used antibiotics in this way?’).

122 Among those reporting the use of antibiotic PEP, we examined recency of use (‘When did you last  
123 use antibiotics in this way?’) and antibiotics ever used. In those who had never used STI prophylaxis,  
124 we calculated (% , 95% CI) those who had considered use (‘Have you ever considered taking  
125 antibiotics in this way?’) (see Appendix I for questions).

126 Correlates of ever using antibiotic post-exposure prophylaxis (PEP) for STI  
127 prevention  
128 Using bivariate and multivariable logistic regression, we examined correlates of ever using antibiotic  
129 PEP, adjusting for sociodemographic characteristics with evidence of association to our outcome and  
130 a composite marker of sexual risk defined as reporting (in the last three months):  $\geq 5$  condomless anal  
131 sex partners, bacterial STI diagnosis, chemsex, and/or meeting partners at sex-on-premises venues,  
132 sex parties, or cruising locations, to minimise collinearity in adjusted models. This composite was  
133 based on previously described predictors of STI prophylaxis use (10, 12).

134 Correlates examined included markers of sexual risk (behavioural characteristics, sexual partnerships  
135 in the last three months), clinical characteristics (HIV status and PrEP use), SHS use in the last year,  
136 well-being, and sexual satisfaction indicators. We used mental health and personal well-being  
137 indicators derived from the UK ONS that were dichotomised, as per ONS harmonisation standards  
138 (27), for measures of low life satisfaction, low life worthwhileness, low happiness, and high anxiety.  
139 Agreement (agree/strongly agree) with the statement, 'I feel satisfied with my sex life' was used as a  
140 measure of sexual satisfaction and based on framing used in the National Surveys of Sexual Attitudes  
141 and Lifestyles (Natsal) (28). In regression analyses, all p-values less than 5% were considered as  
142 evidence of association (i.e., statistically significant).

143 Correlates of self-reported intention to use doxycycline post-exposure prophylaxis  
144 (doxyPEP) and 4CMenB

145 All participants were asked about their likelihood ('Very unlikely', 'Somewhat unlikely', 'Somewhat  
146 likely', 'Very likely', 'I don't know') of doxyPEP uptake, if available and considered safe and  
147 effective, and about their likelihood of 4CMenB uptake (referred to as Bexsero in survey questions), if  
148 available and with 30-50% effectiveness against gonorrhoea (see Appendix I for questions).

149 We initially aimed to use ordinal logistic regression to assess correlates of ordinal uptake outcomes;  
150 However, given heavy skew to the highest positive responses for each intervention, outcome measures  
151 were dichotomised ('Very likely' vs all else), where intention to use (ITU) was defined as those 'very  
152 likely' to consider intervention uptake. As per methodology above, we examined correlates of  
153 doxyPEP and 4CMenB ITU respectively, using bivariate and multivariable logistic regression.

## 154 Results

155 There were 1,322 GBMSM who completed the RiiSH 2023 survey, of whom, 1,106 met participation  
156 criteria and were included in analyses (Appendix II). Half of all participants were recruited from  
157 Grindr (50%), followed by Instagram (23%), Facebook (19%), and community-cascaded links (7%).

158 Participants primarily resided in England (85% 941/1,106), were of White ethnicity (89% 984/1,106),  
159 and were UK-born (78% 860/1,106). The median age of participants was 44 years (interquartile  
160 range: 34-54), with two-thirds reporting degree-level education (62% 691/1,106). Over three-quarters

161 of participants were employed (78% 868/1,106), while less than half (41% 454/1,106) reported being  
162 financially comfortable.

163 In the lookback period (i.e., since August 2023), one in five participants had  $\geq 5$  male condomless anal  
164 sex (CAS) partners (21% 231/1,106) and 8.7% (96/1,106) reported at least one positive bacterial STI  
165 test. Additional characteristics are described in Table 1.

166 Knowledge and use of antibiotic post-exposure prophylaxis (PEP) for STI prevention  
167 Over a third (34%, 95% CI: 34%-37% 373/1,106) of all participants had ever heard about using  
168 antibiotics after sex for STI prevention; 8% (95% CI: 6%-10% 87/1,106) reported ever having used  
169 antibiotic PEP (Figure 1). Among the latter, 84% (73/87) had done so in the last year, where most  
170 reported ever using doxycycline (80%, 68/87) and 69% (60/87) specified its exclusive use. One in ten  
171 participants were uncertain of which antibiotics they had used previously (11% 10/87), and few  
172 reported exclusive azithromycin (2% 2/87) or amoxicillin use (8% 8/87) (Appendix III). In the two-  
173 thirds (65% 717/1,106) of GBMSM who had never used antibiotic PEPs, nearly one in five (18% 95%  
174 CI: 16%-21% 186/1,019) had ever considered use.

175 Factors associated with ever using antibiotic post-exposure prophylaxis (PEP) for STI  
176 prevention

177 GBMSM with lower education levels (aOR: 0.58 [0.34-0.97] below degree-level vs degree-level)  
178 were less likely to report use, while those born outside the UK (aOR: 1.65 [1.01-2.70]), and those  
179 reporting or considering other preventative interventions (e.g., mpox vaccination), were more likely to  
180 report STI prophylaxis use. HIV-PrEP users and people living with HIV (PLWHIV) were more likely  
181 to report STI prophylaxis use than HIV-negative GBMSM not reporting recent HIV-PrEP use (Table  
182 2).

183 Correlates of intention to use doxycycline post-exposure prophylaxis (dPEP ITU)

184 Among all participants, 51% (95% CI: 47%-56%, 568/1,106) reported doxyPEP ITU, reaching 68%  
185 (95% CI: 60%-69%, 487/713) among those with markers of sexual risk in the last three months. In  
186 bivariate analyses, no other sociodemographic characteristics apart from age-group were associated  
187 with doxyPEP ITU. Individual markers of sexual risk (comprising our composite measure) were  
188 positively associated with doxyPEP ITU (Table 3).

189 In age-adjusted models, positive associations between doxyPEP ITU and HIV status and recent PrEP  
190 use remained. Compared to HIV-negative GBMSM without recent PrEP use (in last three months),  
191 PLWHIV (aOR 1.74 [1.28-2.57]) and HIV-negative recent PrEP users (aOR 1.40 [1.17-1.84])  
192 reported doxyPEP ITU. GBMSM who had an SHS visit in the last year were more likely to report  
193 doxyPEP ITU (aOR: 1.66 [1.29-2.14]) while those reporting high anxiety were less likely (aOR 0.77  
194 [0.80-0.99]). 4CMenB ITU was highly correlated with doxyPEP ITU (aOR 8.93 [6.63-12.1]).



195 GBMSM with markers of sexual risk in the last three months were more likely to report doxyPEP ITU  
196 (aOR 1.50 [1.16-1.94]). While we found no association with age in adjusted models, there were  
197 indications of decreased doxyPEP ITU in younger age-groups (aOR 0.71 [0.49-1.03] aged 16-29 vs  
198  $\geq 45$  years).

### 199 Correlates of intention to use 4CMenB (4CMenB ITU)

200 Over two-thirds of all participants (64%, 713/1,106) reported 4CMenB ITU, increasing to 75%  
201 (270/361) among those with markers of sexual risk in the last three months. In bivariate analyses, age-  
202 group, sexual orientation, employment status, HIV status and PrEP use, along with most individual  
203 markers of sexual risk, were associated with 4CMenB ITU (Table 4).

204 In models adjusted for associated sociodemographic characteristics and our composite marker of  
205 sexual risk, PLWHIV and recent HIV-negative PrEP users were about twice as likely to report  
206 4CMenB ITU compared to HIV-negative GBMSM not reporting recent HIV-PrEP use. Sexual health  
207 service use in the last year (aOR 2.45 [1.87-3.21]) and uptake of preventative interventions (e.g.  
208 mpox vaccination) were positively associated with 4CMenB ITU, and there was high correlation with  
209 doxyPEP ITU (aOR 10.1 [7.33-13.8]).

210 Younger GBMSM were more likely to report 4CMenB ITU (aOR 2.16 [1.44-3.25] aged 16-29 vs  $\geq 45$   
211 years), while bisexual-identifying (aOR 0.62 [0.45-0.86]) and those with lower educational  
212 qualifications (aOR 0.57 [0.44-0.73]) were less likely to report 4CMenB ITU. GBMSM with  
213 composite markers of sexual risk were twice as likely to report ITU (aOR 2.09 [1.56-2.79]).

## 214 Discussion

215 We show that the majority of GBMSM in our community sample would choose to access to doxyPEP  
216 and the 4CMenB vaccine were they available and recommended for use in the UK, and that intention  
217 to use is greater in those potentially most likely to benefit. Over half of participants (51%) expressed  
218 an intention use doxyPEP, with even greater levels (64%) reporting intention to use 4CMenB. While  
219 findings demonstrate substantial interest in the use of doxyPEP, fewer than one in ten (8%) GBMSM  
220 who responded to this survey reported use of antibiotic PEP, with usage more common among those  
221 at greater risk of STIs. These findings, however, are based on small absolute numbers, but update  
222 previous estimates of the extent of antibiotic PEP use in GBMSM prior to the publication of the first  
223 UK guidelines.

224 Among those using antibiotic PEP, most reported use of appropriate, evidence-based antibiotics for  
225 use as post-exposure STI prophylaxis (i.e., doxycycline). However, there were indications of  
226 unknown and inappropriate antibiotic use, which is concerning given this may drive AMR as well as  
227 cause individual harm, possibly to a greater extent than doxyPEP use. Over a third of all participants

228 reported knowledge of antibiotic PEP for STI prevention, and while few reported uptake, one in five  
229 of GBMSM who had not reported use had ever considered taking antibiotics to prevent STIs.

230 Consistent with previous studies (10-12), we found higher uptake of STI prophylaxis in PLWHIV  
231 (15%), HIV-PrEP users (12%), and GBMSM at greater risk of STIs as indicated by recent markers of  
232 sexual risk (14%). GBMSM with lower levels of education were less likely to report antibiotic PEP  
233 use, while prior mpox vaccination uptake was positively associated with use. Compared with a recent  
234 study in Germany which estimate doxyPEP uptake in around 20% of GBMSM (29), our sample  
235 estimates were lower but this may reflect the wider availability of STI testing in the UK (30, 31).  
236 Given the current evidence base, we framed uptake of prophylactic antibiotics around post-exposure  
237 use. Questions across behavioural surveys, including prior RiiSH rounds, have included questions  
238 about both pre- and post-exposure use. This may limit comparisons with estimates in previous  
239 literature and underestimate overall use of STI prophylaxis as STI prevention. Future research,  
240 monitoring and evaluation would benefit from a consistent definition, which will itself be facilitated  
241 by the upcoming national UK guidelines.

242 Over half of participants indicated doxyPEP ITU. While there was a high correlation between  
243 doxyPEP and 4CMenB ITU, a higher proportion of GBMSM - approximately two-thirds - reported  
244 4CMenB ITU. AMR concerns, consistently highlighted in contemporary health settings as part of  
245 antimicrobial stewardship initiatives (32), could explain lower doxyPEP ITU. Those reporting high  
246 anxiety were less likely to report doxyPEP ITU, which may signal hesitancy arising from AMR  
247 worries and reluctance to use antibiotics prophylactically. Similar views were found in a qualitative  
248 study of SHS attendees, where there was greater acceptability and support of vaccinations for STI  
249 prevention as alternatives to antibiotic prophylaxis use (33). We found levels of 4CMenB ITU were  
250 similar to the high self-reported uptake of opportunistically offered Hepatitis A, Hepatitis B and  
251 human papillomavirus (HPV) vaccination in SHS among a community sample of GBMSM (34),  
252 which may influence greater 4CMenB uptake acceptability.

253 As with STI prophylaxis uptake, PLWHIV, recent HIV-PrEP users, those accessing SHS, and those at  
254 greater sexual risk were more likely to report 4CMenB ITU. However, we also found further  
255 associations with age and sexual orientation. Younger age-groups were more likely to report 4CMenB  
256 ITU, which may present opportunities for further prevention intervention education and uptake in  
257 groups with known STI outcome inequalities (35). Like recent vaccination uptake examinations in  
258 GBMSM (34, 36), we found differences by socioeconomic characteristics, with lower 4CMenB ITU  
259 in those reporting educational qualifications below degree-level; as well as lower ITU among sexual  
260 minorities (i.e., bisexual and straight-identifying GBMSM). Inclusive and accessible health promotion  
261 and patient education surrounding novel STI prevention interventions, especially considering self-



262 sourcing of antibiotics, will be imperative to minimise knowledge and uptake inequalities and to  
263 clearly inform risks in balance of benefits to STI prophylaxis use.

## 264 Limitations

265 This cross-sectional study is subject to limitations. Our sample population likely experiences higher  
266 levels of sexual risk relative to the wider population of GBMSM in the UK (37, 38). We aimed to  
267 recruit from a broader spectrum of GBMSM who likely have differing sexual risk relative to clinic  
268 recruited samples. ITU measures may not equate to uptake in practice but help gauge interest and  
269 acceptability among GBMSM who would likely comprise targeted groups for these interventions.  
270 Dichotomising outcome measures limits interpretation and could have led to conservative ITU  
271 estimates. While we posited that sexual satisfaction could be influenced by actual or intended uptake  
272 of STI prevention interventions, we found no evidence of association, though larger studies are  
273 needed to examine the role of uptake on more holistic measures of sexual satisfaction and well-being.  
274 We collected no personal identifiers to facilitate the reporting of sensitive data on sexual behaviours;  
275 however, survey responses may be subject to social acceptability bias. Sample selection could be  
276 subject to digital exclusion, and we do not know how representative our study sample is of GBMSM  
277 using social networking and dating applications. However, consistent methodology and community-  
278 partnered implementation are strengths of this long-running survey series and consistently aid the  
279 characterisation of behavioural risk, currently absent from available national STI surveillance, as well  
280 as actual and intended preventative intervention uptake among key populations in the UK.

## 281 Implications

282 Findings from this study illustrate a community sample of GBMSM with considerable interest in the  
283 use of novel biomedical STI interventions, which is not dissimilar to the high uptake seen of HIV-  
284 PrEP and other STI and viral hepatitis vaccination in UK GBMSM. As seen in the PrEP Impact Trial,  
285 an implementation trial assessing HIV-PrEP eligibility and uptake in the UK from 2017-2020 (39),  
286 eligibility for trial places quickly outstripped availability at the onset of the trial (10,000, increasing to  
287 26,000), largely attributable to early knowledge and engagement facilitated by community  
288 organisations (40, 41). A significant proportion of our community sample indicated likely uptake of  
289 these preventative interventions with high correlation of ITU for both, signalling the benefit of shared  
290 education and offer of prevention interventions within SHS or outreach settings. GBMSM at greater  
291 risk of STIs were more likely to report ever using STI prophylaxis as well as doxyPEP and 4CMenB  
292 ITU, suggesting an appropriate assessment of personal sexual risk, however, we did find potential  
293 sociodemographic and SHS engagement-based uptake differences common in uptake of other  
294 preventative interventions such as mpox vaccination and HIV-PrEP. While there is no  
295 recommendation for the use of doxyPEP as STI prevention in the UK at the time of writing, there are  
296 early indications of knowledge of antibiotic PEP, as well as uptake among GBMSM through private  
297 or off-license purchasing. Community-led knowledge mobilisation efforts (42) have likely boosted

298 awareness of evidence-based uptake regimens associated with STI incidence declines in GBMSM,  
299 now recommended in some US cities (43). At present, the upcoming UK doxyPEP guidelines will  
300 likely influence the decision of implementation across SHS. Also, the JCVI recommendation for a  
301 targeted opportunistic gonorrhoea vaccination programme using 4CMenB is awaiting approval by  
302 health ministers in the UK.

### 303 Conclusion

304 While regular testing, condom promotion, and treatment as prevention remain an integral foundation  
305 to STI prevention in the UK, these approaches have not curbed rapid increases in STI diagnoses  
306 among GBMSM and other key populations in the last decade. Novel prevention interventions should  
307 be considered to supplement existing control strategies. As adoption of doxyPEP, 4CMenB  
308 vaccination and other interventions across SHS is considered in the UK, future guidelines and health  
309 promotion messaging must be carefully crafted alongside clinical experts and community partners  
310 given intervention complexity, implications to sexual behaviour and AMR selection, and the risk of  
311 presenting conflicting public health messages regarding antibiotic stewardship. Robust monitoring  
312 and evaluation will be crucial to understand the impact of doxyPEP and 4CMenB use on AMR and  
313 STI incidence in key populations if rolled out across SHS. Given lessons learned from the  
314 implementation of HIV prevention interventions, the magnitude of community interest and uptake  
315 must not be underestimated and there will be a need to ensure equitable access to these interventions  
316 to those in greatest need (24). There will be a similar need for equity considerations in health  
317 promotion, patient education and uptake across different service models, including those delivered  
318 primarily online, depending on local need. Minimising knowledge and potential accessibility barriers  
319 for those who may benefit from future STI preventative interventions must be considered from the  
320 outset of planning and embedded in implementation and monitoring to limit health inequalities and to  
321 facilitate empowered decision-making that benefits individual-level sexual wellbeing and autonomy.

### 322 Acknowledgements:

323 We thank Elizabeth Fearon (University College London), Takudzwa Mukiwa (Terrence Higgins  
324 Trust), Will Nutland (The Love Tank) and Benjamin Weil (The Love Tank) for their review and  
325 contributions to the RiiSH 2023 survey. We thank Emmanuel Musah for review of our draft  
326 manuscript.

327 We acknowledge members of the National Institute for Health and Care Research Health Protection  
328 Research Unit (NIHR HPRU) in Blood Borne and Sexually Transmitted Infections (BBSTI) Steering  
329 Committee: Caroline Sabin, John Saunders, Catherine H. Mercer, Hamish Mohammed (previously  
330 Gwenda Hughes), Greta Rait, Ruth Simmons, William Rosenberg, Tamyo Mbisa, Rosalind Raine,  
331 Sema Mandal, Rosamund Yu, Samreen Ijaz, Fabiana Lorencatto, Rachel Hunter, Kirsty Foster and  
332 Mamooma Tahir.

### 333 Data availability statement:

334 The data that support the findings of this study are available upon reasonable request from the UK  
335 Health Security Agency (UKHSA). Requests can be directed to Dr Hamish Mohammed  
336 ([riish\\_survey@ukhsa.gov.uk](mailto:riish_survey@ukhsa.gov.uk)).

### 337 Keywords:

338 STI prevention, GBMSM, doxyPEP, Bexsero, 4CMenB, meningococcal B vaccine, vaccination,  
339 antibiotics, UK

### 340 Funding:

341 This study did not receive any funding; however, David Reid and Catherine H Mercer were funded as  
342 part of The National Institute for Health Research Health Protection Research Unit in Blood Borne  
343 and Sexually Transmitted Infections at University College London in partnership with the UK Health  
344 Security Agency.

### 345 Ethical approval:

346 Young people aged 16-17 years were eligible to participate in this survey as this group represent a key  
347 population at risk of STI acquisition in the UK and are important to include in this research. Parental  
348 consent of participants aged 18 or younger was not sought. Ethical guidelines produced by the British  
349 Psychological Society and General Medical Council suggest consent from parents should be sought  
350 for those under age 16 and that those aged 16 and over may be presumed to be able to reach informed  
351 consent if the information on the study, and the way that data is collected, stored, and used is clear  
352 (1,2). This information is included for all potential participants at the beginning of the survey. Ethical  
353 approval of this study was provided by the UKHSA Research and Ethics Governance Group (REGG;  
354 ref: R&D 524). Online informed consent was received from all participants and all methods were  
355 performed in accordance with guidelines and regulations set by the UKHSA REGG.

356 1. Oates, J., Carpenter, D., Fisher, M., Goodson, S., Hannah, B., Kwiatkowski, R., Prutton, K.,  
357 Reeves, D., & Wainwright, T. (2021). BPS code of human research ethics  
358 2. General Medical Council. (2018). 0-18 years: guidance for all doctors. Making Decisions –  
359 Assessing the capacity to consent.

### 360 Competing interests:

361 Authors have no competing interests to declare.

362

363

## 364 References

- 365 1. Mighelsen S, Enayat Q, Harb A, Daahir U, Slater L, Anderson A, et al. Sexually transmitted  
366 infections and screening for chlamydia in England, 2022: UK Health Security Agency, London; 2023  
367 [Available from: [https://www.gov.uk/government/statistics/sexually-transmitted-infections-stis-](https://www.gov.uk/government/statistics/sexually-transmitted-infections-stis-annual-data-tables/sexually-transmitted-infections-and-screening-for-chlamydia-in-england-2022-report)  
368 [annual-data-tables/sexually-transmitted-infections-and-screening-for-chlamydia-in-england-2022-](https://www.gov.uk/government/statistics/sexually-transmitted-infections-and-screening-for-chlamydia-in-england-2022-report)  
369 [report](https://www.gov.uk/government/statistics/sexually-transmitted-infections-and-screening-for-chlamydia-in-england-2022-report).
- 370 2. Mohammed H, Blomquist P, Ogaz D, Duffell S, Furegato M, Checchi M, et al. 100 years of  
371 STIs in the UK: a review of national surveillance data. *Sex Transm Infect.* 2018;94(8):553-8.
- 372 3. Brown AE, Nash S, Connor N, Kirwan PD, Ogaz D, Croxford S, et al. Towards elimination of  
373 HIV transmission, AIDS and HIV-related deaths in the UK. *HIV Med.* 2018.
- 374 4. Kong FYS, Kenyon C, Unemo M. Important considerations regarding the widespread use of  
375 doxycycline chemoprophylaxis against sexually transmitted infections. *J Antimicrob Chemother.*  
376 2023;78(7):1561-8.
- 377 5. Grant JS, Stafylis C, Celum C, Grennan T, Haire B, Kaldor J, et al. Doxycycline Prophylaxis for  
378 Bacterial Sexually Transmitted Infections. *Clin Infect Dis.* 2020;70(6):1247-53.
- 379 6. Traeger MW, Mayer KH, Krakower DS, Gitin S, Jenness SM, Marcus JL. Potential impact of  
380 doxycycline post-exposure prophylaxis prescribing strategies on incidence of bacterial sexually  
381 transmitted infections. *Clin Infect Dis.* 2023.
- 382 7. UK Health Security Agency. Mpox and sexual health: outreach and engagement fund 2022  
383 [cited 2024 10 May]. Available from: [https://www.gov.uk/government/publications/mpox-and-](https://www.gov.uk/government/publications/mpox-and-sexual-health-outreach-and-engagement-fund)  
384 [sexual-health-outreach-and-engagement-fund](https://www.gov.uk/government/publications/mpox-and-sexual-health-outreach-and-engagement-fund).
- 385 8. Zhang X-S, Mandal S, Mohammed H, Turner C, Florence I, Walker J, et al. Transmission  
386 dynamics and effect of control measures on the 2022 outbreak of mpox among gay, bisexual, and  
387 other men who have sex with men in England: a mathematical modelling study. *The Lancet*  
388 *Infectious Diseases.* 2024;24(1):65-74.
- 389 9. Kenyon C, Herrmann B, Hughes G, de Vries HJC. Management of asymptomatic sexually  
390 transmitted infections in Europe: towards a differentiated, evidence-based approach. *The Lancet*  
391 *Regional Health - Europe.* 2023;34:100743.
- 392 10. O'Halloran C, Croxford S, Mohammed H, Gill ON, Hughes G, Fifer H, et al. Factors associated  
393 with reporting antibiotic use as STI prophylaxis among HIV PrEP users: findings from a cross-sectional  
394 online community survey, May-July 2019, UK. *Sex Transm Infect.* 2021;97(6):429-33.
- 395 11. Ogaz D, Logan L, Curtis TJ, McDonagh L, Guerra L, Bradshaw D, et al. PrEP use and unmet  
396 PrEP-need among men who have sex with men in London prior to the implementation of a national  
397 PrEP programme, a cross-sectional study from June to August 2019. *BMC Public Health.*  
398 2022;22(1):1105.
- 399 12. Kohli M, Reid D, Pulford CV, Howarth A, Brown J, Mohammed H, et al. Choice of antibiotics  
400 for prophylaxis of bacterial STIs among individuals currently self-sourcing. *Sex Transm Infect.*  
401 2022;98(2):158.
- 402 13. Molina JM, Charreau I, Chidiac C, Pialoux G, Cua E, Delaugerre C, et al. Post-exposure  
403 prophylaxis with doxycycline to prevent sexually transmitted infections in men who have sex with  
404 men: an open-label randomised substudy of the ANRS IPERGAY trial. *Lancet Infect Dis.*  
405 2018;18(3):308-17.
- 406 14. Molina JM, Berçot B, Assoumou L, Algarte-Genin M, Rubenstein E, Pialoux G, et al. Final  
407 Results of ANRS 174 DOXYVAC: A Randomized trial to Prevent STIs in MSM on PrEP Conference on  
408 Retroviruses and Opportunistic Infections, Denver, Colorado2024 [updated 2024 March; cited 2024  
409 01 May]. Available from: [https://www.croiconference.org/abstract/final-results-of-anrs-174-](https://www.croiconference.org/abstract/final-results-of-anrs-174-doxyvac-a-randomized-trial-to-prevent-sti-in-msm-on-prep/)  
410 [doxyvac-a-randomized-trial-to-prevent-sti-in-msm-on-prep/](https://www.croiconference.org/abstract/final-results-of-anrs-174-doxyvac-a-randomized-trial-to-prevent-sti-in-msm-on-prep/).
- 411 15. Luetkemeyer AF, Donnell D, Dombrowski JC, Cohen S, Grabow C, Brown CE, et al.  
412 Postexposure Doxycycline to Prevent Bacterial Sexually Transmitted Infections. *N Engl J Med.*  
413 2023;388(14):1296-306.

- 414 16. Luetkemeyer A, Donnell D, Cohen S, Dombrowski J, Grabow C, Brown C, et al. Sustained  
415 Reduction of Bacterial STIs During the DoxyPEP Study Open-Label Extension Conference on  
416 Retroviruses and Opportunistic Infections, Denver, Colorado2024 [updated 2024 March; cited 2024  
417 01 May]. Available from: [https://www.croiconference.org/abstract/sustained-reduction-of-bacterial-](https://www.croiconference.org/abstract/sustained-reduction-of-bacterial-stis-during-the-doxy pep-study-open-label-extension/)  
418 [stis-during-the-doxy pep-study-open-label-extension/](https://www.croiconference.org/abstract/sustained-reduction-of-bacterial-stis-during-the-doxy pep-study-open-label-extension/).
- 419 17. Sankaran M, Glidden D, Kohn R, Liebi C, Torres T, Buchbinder S, et al. Doxy-PEP Associated  
420 With Declines in Chlamydia and Syphilis in MSM and Trans Women in San Francisco Conference on  
421 Retroviruses and Opportunistic Infections, Denver, Colorado2024 [updated 2024 March; cited 2024  
422 01 May]. Available from: [https://www.croiconference.org/abstract/doxy-pep-associated-with-](https://www.croiconference.org/abstract/doxy-pep-associated-with-declines-in-chlamydia-and-syphilis-in-msm-and-trans-women-in-san-francisco/)  
423 [declines-in-chlamydia-and-syphilis-in-msm-and-trans-women-in-san-francisco/](https://www.croiconference.org/abstract/doxy-pep-associated-with-declines-in-chlamydia-and-syphilis-in-msm-and-trans-women-in-san-francisco/).
- 424 18. Leduc I, Connolly KL, Begum A, Underwood K, Darnell S, Shafer WM, et al. The serogroup B  
425 meningococcal outer membrane vesicle-based vaccine 4CMenB induces cross-species protection  
426 against *Neisseria gonorrhoeae*. *PLOS Pathogens*. 2020;16(12):e1008602.
- 427 19. Whittles LK, Didelot X, White PJ. Public health impact and cost-effectiveness of gonorrhoea  
428 vaccination: an integrated transmission-dynamic health-economic modelling analysis. *Lancet Infect*  
429 *Dis*. 2022;22(7):1030-41.
- 430 20. Ladhani SN, White PJ, Campbell H, Mandal S, Borrow R, Andrews N, et al. Use of a  
431 meningococcal group B vaccine (4CMenB) in populations at high risk of gonorrhoea in the UK. *Lancet*  
432 *Infect Dis*. 2024.
- 433 21. Abara WE, Bernstein KT, Lewis FMT, Schillinger JA, Feemster K, Pathela P, et al. Effectiveness  
434 of a serogroup B outer membrane vesicle meningococcal vaccine against gonorrhoea: a  
435 retrospective observational study. *The Lancet Infectious Diseases*. 2022;22(7):1021-9.
- 436 22. Petousis-Harris H, Paynter J, Morgan J, Saxton P, McArdle B, Goodyear-Smith F, Black S.  
437 Effectiveness of a group B outer membrane vesicle meningococcal vaccine against gonorrhoea in  
438 New Zealand: a retrospective case-control study. *The Lancet*. 2017;390(10102):1603-10.
- 439 23. Wang B, Giles L, Andraweera P, McMillan M, Almond S, Beazley R, et al. 4CMenB sustained  
440 vaccine effectiveness against invasive meningococcal B disease and gonorrhoea at three years post  
441 programme implementation. *Journal of Infection*. 2023;87(2):95-102.
- 442 24. Joint Committee on Vaccination and Immunisation. JCVI advice on the use of meningococcal  
443 B vaccination for the prevention of gonorrhoea 2023 [cited 2024 04 April]. Available from:  
444 [https://www.gov.uk/government/publications/meningococcal-b-vaccination-for-the-prevention-of-](https://www.gov.uk/government/publications/meningococcal-b-vaccination-for-the-prevention-of-gonorrhoea-jcvi-advice-10-november/jcvi-advice-on-the-use-of-meningococcal-b-vaccination-for-the-prevention-of-gonorrhoea)  
445 [gonorrhoea-jcvi-advice-10-november/jcvi-advice-on-the-use-of-meningococcal-b-vaccination-for-](https://www.gov.uk/government/publications/meningococcal-b-vaccination-for-the-prevention-of-gonorrhoea-jcvi-advice-10-november/jcvi-advice-on-the-use-of-meningococcal-b-vaccination-for-the-prevention-of-gonorrhoea)  
446 [the-prevention-of-gonorrhoea](https://www.gov.uk/government/publications/meningococcal-b-vaccination-for-the-prevention-of-gonorrhoea-jcvi-advice-10-november/jcvi-advice-on-the-use-of-meningococcal-b-vaccination-for-the-prevention-of-gonorrhoea).
- 447 25. Wayal S, Reid D, Weatherburn P, Blomquist P, Fabiane S, Hughes G, Mercer CH. Association  
448 between knowledge, risk behaviours, and testing for sexually transmitted infections among men  
449 who have sex with men: findings from a large online survey in the United Kingdom. *HIV medicine*.  
450 2019;20(8):523-33.
- 451 26. Howarth A, Saunders J, Reid D, Kelly I, Wayal S, Weatherburn P, et al. 'Stay at home ...':  
452 exploring the impact of the COVID-19 public health response on sexual behaviour and health service  
453 use among men who have sex with men: findings from a large online survey in the UK. *Sexually*  
454 *Transmitted Infections*. 2022;98(5):346.
- 455 27. Office for National Statistics. Personal well-being user guidance 2018 [Available from:  
456 [https://www.ons.gov.uk/peoplepopulationandcommunity/wellbeing/methodologies/personalwellb](https://www.ons.gov.uk/peoplepopulationandcommunity/wellbeing/methodologies/personalwellbeingingsurveyuserguide)  
457 [eingsurveyuserguide](https://www.ons.gov.uk/peoplepopulationandcommunity/wellbeing/methodologies/personalwellbeingingsurveyuserguide)].
- 458 28. Mercer CH, Tanton C, Prah P, Erens B, Sonnenberg P, Clifton S, et al. Changes in sexual  
459 attitudes and lifestyles in Britain through the life course and over time: findings from the National  
460 Surveys of Sexual Attitudes and Lifestyles (Natsal). *The Lancet*. 2013;382(9907):1781-94.
- 461 29. Hornuss D, Mathé P, Usadel S, Zimmermann S, Müller M, Rieg S. Already current practice? A  
462 snapshot survey on doxycycline use for prevention of sexually transmitted infections in parts of the  
463 German MSM community. *Infection*. 2023;51(6):1831-4.



- 464 30. European Centre for Disease Prevention and Control. EMIS-2017 The European Men-Who-  
465 Have Sex-With-Men Internet Survey: Key findings from 50 countries 2019 [cited 2024 01 May].  
466 Available from: [https://www.ecdc.europa.eu/sites/default/files/documents/European-MSM-](https://www.ecdc.europa.eu/sites/default/files/documents/European-MSM-internet-survey-2017-findings.pdf)  
467 [internet-survey-2017-findings.pdf](https://www.ecdc.europa.eu/sites/default/files/documents/European-MSM-internet-survey-2017-findings.pdf).
- 468 31. Doran J, Weatherburn P, Hickson F, Marcus U, Reid D, Schmidt AJ. An update on the  
469 performance of STI services for gay and bisexual men across European cities: results from the 2017  
470 European MSM Internet Survey. *Sex Transm Infect.* 2021;97(3):201-8.
- 471 32. Chaintarli K, Ingle SM, Bhattacharya A, Ashiru-Oredope D, Oliver I, Gobin M. Impact of a  
472 United Kingdom-wide campaign to tackle antimicrobial resistance on self-reported knowledge and  
473 behaviour change. *BMC Public Health.* 2016;16:1-9.
- 474 33. King AJ, Bilardi JE, Maddaford K, Fairley CK, Chow EPF, Phillips TR. Sexual health clinic  
475 attendees' views on antibiotic post-exposure prophylaxis and vaccinations for sexually transmitted  
476 infections prevention: A qualitative study. *Preventive Medicine Reports.* 2024;38:102628.
- 477 34. Baldry G, Phillips D, Wilkie R, Checchi M, Folkard K, Simmons R, et al. Factors associated with  
478 human papillomavirus, hepatitis A, hepatitis B and mpox vaccination uptake among gay, bisexual  
479 and other men who have sex with men in the UK – findings from the large community-based RiSH-  
480 Mpx survey. *medRxiv.* 2024:2024.03.08.24303981.
- 481 35. Fountain H, Migchelsen SJ, Charles H, Ram T, Fifer H, Mohammed H, Sinka K. Rebound of  
482 Gonorrhoea after Lifting of COVID-19 Preventive Measures, England. *Emerg Infect Dis.*  
483 2024;30(2):329-32.
- 484 36. Ogaz D, Enayat Q, Brown JRG, Phillips D, Wilkie R, Jayes D, et al. Mpx Diagnosis, Behavioral  
485 Risk Modification, and Vaccination Uptake among Gay, Bisexual, and Other Men Who Have Sex with  
486 Men, United Kingdom, 2022. *Emerg Infect Dis.* 2024;30(5).
- 487 37. Prah P, Hickson F, Bonell C, McDaid LM, Johnson AM, Wayal S, et al. Men who have sex with  
488 men in Great Britain: comparing methods and estimates from probability and convenience sample  
489 surveys. *Sex Transm Infect.* 2016;92(6):455-63.
- 490 38. Cabecinha M, Mercer CH, Gravningen K, Aicken C, Jones KG, Tanton C, et al. Finding sexual  
491 partners online: prevalence and associations with sexual behaviour, STI diagnoses and other sexual  
492 health outcomes in the British population. *Sex Transm Infect.* 2017;93(8):572-82.
- 493 39. Sullivan AK, Saunders J, Desai M, Cartier A, Mitchell HD, Jaffer S, et al. HIV pre-exposure  
494 prophylaxis and its implementation in the PrEP Impact Trial in England: a pragmatic health  
495 technology assessment. *Lancet HIV.* 2023;10(12):e790-e806.
- 496 40. PrEPster. 2024 [cited 2024 04 April]. Available from: <https://prepster.info/>.
- 497 41. I Want PrEP Now. 2024 [cited 2024 21 April]. Available from:  
498 <https://www.iwantprepnw.co.uk/>.
- 499 42. Queer Health Info. doxyPEP 2024 [cited 2024 21 April]. Available from:  
500 <https://www.queerhealth.info/projects/doxy pep>.
- 501 43. San Francisco Department of Public Health. Doxycycline Post-Exposure Prophylaxis Reduces  
502 Incidence of Sexually Transmitted Infections 2022 [Available from: [https://www.sfdcp.org/wp-](https://www.sfdcp.org/wp-content/uploads/2022/10/Health-Update-Doxycycline-Post-Exposure-Prophylaxis-Reduces-Incidence-of-Sexually-Transmitted-Infections-SFDPH-FINAL-10.20.2022.pdf)  
503 [content/uploads/2022/10/Health-Update-Doxycycline-Post-Exposure-Prophylaxis-Reduces-](https://www.sfdcp.org/wp-content/uploads/2022/10/Health-Update-Doxycycline-Post-Exposure-Prophylaxis-Reduces-Incidence-of-Sexually-Transmitted-Infections-SFDPH-FINAL-10.20.2022.pdf)  
504 [Incidence-of-Sexually-Transmitted-Infections-SFDPH-FINAL-10.20.2022.pdf](https://www.sfdcp.org/wp-content/uploads/2022/10/Health-Update-Doxycycline-Post-Exposure-Prophylaxis-Reduces-Incidence-of-Sexually-Transmitted-Infections-SFDPH-FINAL-10.20.2022.pdf).

505



506 **Table 1. RiiSH 2023 participant characteristics (n=1,106)**

|                                                          | % (No.)      |
|----------------------------------------------------------|--------------|
| <b>All RiiSH 2023 participants</b>                       | 100% (1,106) |
| <b>Recruitment site</b>                                  |              |
| Grindr                                                   | 50% (553)    |
| Instagram                                                | 23% (253)    |
| Facebook                                                 | 19% (213)    |
| Twitter                                                  | 1% (8)       |
| Community-cascaded link                                  | 7% (79)      |
| <b>Sociodemographic characteristics</b>                  |              |
| Age at survey completion (interquartile range)           | 44 (34-54)   |
| Age at survey completion (standard deviation)            | 44.1 (12.7)  |
| <b>Age-group (3 categories)</b>                          |              |
| 16-29                                                    | 14% (151)    |
| 30-44                                                    | 38% (416)    |
| 45 and over                                              | 49% (539)    |
| <b>Gender identity and sex at birth</b>                  |              |
| All other gender identity groups                         | 5% (55)      |
| Cisgender male                                           | 95% (1,051)  |
| <b>Sexual orientation</b>                                |              |
| Gay/homosexual                                           | 82% (910)    |
| Bisexual‡                                                | 18% (196)    |
| <b>Ethnic group</b>                                      |              |
| White                                                    | 89% (984)    |
| Black                                                    | 2% (17)      |
| Asian                                                    | 5% (56)      |
| Mixed or other                                           | 4% (49)      |
| <b>Country of birth</b>                                  |              |
| Outside of the UK                                        | 22% (246)    |
| UK                                                       | 78% (860)    |
| <b>Nation of residence</b>                               |              |
| Scotland, Wales, or N Ireland                            | 15% (165)    |
| England                                                  | 85% (941)    |
| <b>Employment</b>                                        |              |
| Not employed                                             | 22% (238)    |
| Current employment (full-time, part-time, self-employed) | 78% (868)    |
| <b>Educational qualifications</b>                        |              |
| Below degree-level                                       | 38% (415)    |
| Degree-level or higher                                   | 62% (691)    |
| <b>Lives with partner(s)</b>                             |              |
| No                                                       | 63% (693)    |
| Yes                                                      | 37% (413)    |
| <b>Comfortable financial situation</b>                   |              |
| No                                                       | 59% (652)    |
| Yes (top two quartiles)§                                 | 41% (454)    |
| <b>Clinical and behavioural characteristics</b>          |              |
| <b>HIV status and HIV-PrEP use history</b>               |              |

|                                                                                       |             |
|---------------------------------------------------------------------------------------|-------------|
| HIV negative/unknown - Never used HIV-PrEP                                            | 39% (433)   |
| HIV negative/unknown - No HIV-PrEP use since August 2023                              | 9% (105)    |
| HIV negative/unknown - HIV-PrEP use since August 2023                                 | 38% (425)   |
| PLWHIV                                                                                | 13% (143)   |
| <b>Recreational drug use associated with chemsex in the last year</b>                 |             |
| No                                                                                    | 93% (1,030) |
| Yes‡                                                                                  | 7% (76)     |
| <b>Bacterial STI diagnosis since August 2023</b>                                      |             |
| No                                                                                    | 91% (1,010) |
| Yes                                                                                   | 9% (96)     |
| <b>Tried to get an STI test since August 2023</b>                                     |             |
| No                                                                                    | 48% (532)   |
| Yes, able to get a STI test                                                           | 44% (489)   |
| Yes, unable to get a STI test                                                         | 8% (85)     |
| <b>SHS visit since December 2022 (last year)</b>                                      |             |
| No                                                                                    | 42% (470)   |
| Yes                                                                                   | 58% (636)   |
| <b>Mpox vaccination history (≥1 dose)</b>                                             |             |
| No                                                                                    | 58% (636)   |
| Yes                                                                                   | 42% (470)   |
| <b>Partnerships since August 2023</b>                                                 |             |
| <b>Any new male physical sex partner(s)</b>                                           |             |
| No new partners                                                                       | 32% (351)   |
| 1 or more new partners                                                                | 68% (755)   |
| <b>Met male physical sex partner(s) at SOP venue, sex party, or cruising location</b> |             |
| No                                                                                    | 85% (945)   |
| Yes                                                                                   | 15% (161)   |
| <b>Number of male physical sex partner(s)</b>                                         |             |
| No sex or only virtual sex                                                            | 12% (138)   |
| 1 partner                                                                             | 20% (226)   |
| 2-4 partners                                                                          | 25% (277)   |
| 5-9 partners                                                                          | 18% (195)   |
| 10 or more partners                                                                   | 24% (270)   |
| <b>Number of male condomless anal sex (CAS) partner(s)</b>                            |             |
| No known CAS partners                                                                 | 35% (383)   |
| 1 CAS partner                                                                         | 24% (270)   |
| 2-4 CAS partners                                                                      | 20% (222)   |
| 5 or more CAS partners                                                                | 21% (231)   |
| <b>Markers of sexual risk in the last 3 months (composite)¶</b>                       |             |
| No                                                                                    | 67% (745)   |
| Yes                                                                                   | 33% (361)   |
| <b>Personal well-being measures</b>                                                   |             |
| <b>Low life satisfaction</b>                                                          |             |
| No                                                                                    | 78% (862)   |
| Yes                                                                                   | 22% (242)   |
| Not specified                                                                         | <1% (2)     |
| <b>Low life worthwhileness</b>                                                        |             |
| No                                                                                    | 80% (887)   |
| Yes                                                                                   | 20% (217)   |
| Not specified                                                                         | <1% (2)     |

|                                                                                                                                                                                                                                                                                                                                                                                                                                                                                                                                                                                                                                                                                                                                                                                                                                                                                                                                                                                                                                                                                                                                         |             |
|-----------------------------------------------------------------------------------------------------------------------------------------------------------------------------------------------------------------------------------------------------------------------------------------------------------------------------------------------------------------------------------------------------------------------------------------------------------------------------------------------------------------------------------------------------------------------------------------------------------------------------------------------------------------------------------------------------------------------------------------------------------------------------------------------------------------------------------------------------------------------------------------------------------------------------------------------------------------------------------------------------------------------------------------------------------------------------------------------------------------------------------------|-------------|
| <b>Low happiness (yesterday)</b>                                                                                                                                                                                                                                                                                                                                                                                                                                                                                                                                                                                                                                                                                                                                                                                                                                                                                                                                                                                                                                                                                                        |             |
| No                                                                                                                                                                                                                                                                                                                                                                                                                                                                                                                                                                                                                                                                                                                                                                                                                                                                                                                                                                                                                                                                                                                                      | 77% (853)   |
| Yes                                                                                                                                                                                                                                                                                                                                                                                                                                                                                                                                                                                                                                                                                                                                                                                                                                                                                                                                                                                                                                                                                                                                     | 23% (251)   |
| Not specified                                                                                                                                                                                                                                                                                                                                                                                                                                                                                                                                                                                                                                                                                                                                                                                                                                                                                                                                                                                                                                                                                                                           | <1% (2)     |
| <b>High anxiety (yesterday)</b>                                                                                                                                                                                                                                                                                                                                                                                                                                                                                                                                                                                                                                                                                                                                                                                                                                                                                                                                                                                                                                                                                                         |             |
| No                                                                                                                                                                                                                                                                                                                                                                                                                                                                                                                                                                                                                                                                                                                                                                                                                                                                                                                                                                                                                                                                                                                                      | 63% (695)   |
| Yes                                                                                                                                                                                                                                                                                                                                                                                                                                                                                                                                                                                                                                                                                                                                                                                                                                                                                                                                                                                                                                                                                                                                     | 37% (409)   |
| Not specified                                                                                                                                                                                                                                                                                                                                                                                                                                                                                                                                                                                                                                                                                                                                                                                                                                                                                                                                                                                                                                                                                                                           | <1% (2)     |
| <b>Sexual satisfaction</b>                                                                                                                                                                                                                                                                                                                                                                                                                                                                                                                                                                                                                                                                                                                                                                                                                                                                                                                                                                                                                                                                                                              |             |
| "I feel satisfied with my sex life" <sup>††</sup>                                                                                                                                                                                                                                                                                                                                                                                                                                                                                                                                                                                                                                                                                                                                                                                                                                                                                                                                                                                                                                                                                       |             |
| Disagree/do not agree nor disagree                                                                                                                                                                                                                                                                                                                                                                                                                                                                                                                                                                                                                                                                                                                                                                                                                                                                                                                                                                                                                                                                                                      | 58% (646)   |
| Agree/strongly agree                                                                                                                                                                                                                                                                                                                                                                                                                                                                                                                                                                                                                                                                                                                                                                                                                                                                                                                                                                                                                                                                                                                    | 42% (460)   |
| <b>Intention to use doxyPEP*</b>                                                                                                                                                                                                                                                                                                                                                                                                                                                                                                                                                                                                                                                                                                                                                                                                                                                                                                                                                                                                                                                                                                        |             |
| Very unlikely                                                                                                                                                                                                                                                                                                                                                                                                                                                                                                                                                                                                                                                                                                                                                                                                                                                                                                                                                                                                                                                                                                                           | 10% (112)   |
| Somewhat unlikely                                                                                                                                                                                                                                                                                                                                                                                                                                                                                                                                                                                                                                                                                                                                                                                                                                                                                                                                                                                                                                                                                                                       | 10% (110)   |
| Somewhat likely                                                                                                                                                                                                                                                                                                                                                                                                                                                                                                                                                                                                                                                                                                                                                                                                                                                                                                                                                                                                                                                                                                                         | 23% (251)   |
| Very likely                                                                                                                                                                                                                                                                                                                                                                                                                                                                                                                                                                                                                                                                                                                                                                                                                                                                                                                                                                                                                                                                                                                             | 51% (568)   |
| Don't know                                                                                                                                                                                                                                                                                                                                                                                                                                                                                                                                                                                                                                                                                                                                                                                                                                                                                                                                                                                                                                                                                                                              | 6% (65)     |
| <b>Intention to use 4CMenB*</b>                                                                                                                                                                                                                                                                                                                                                                                                                                                                                                                                                                                                                                                                                                                                                                                                                                                                                                                                                                                                                                                                                                         |             |
| Very unlikely                                                                                                                                                                                                                                                                                                                                                                                                                                                                                                                                                                                                                                                                                                                                                                                                                                                                                                                                                                                                                                                                                                                           | 7% (78)     |
| Somewhat unlikely                                                                                                                                                                                                                                                                                                                                                                                                                                                                                                                                                                                                                                                                                                                                                                                                                                                                                                                                                                                                                                                                                                                       | 6% (63)     |
| Somewhat likely                                                                                                                                                                                                                                                                                                                                                                                                                                                                                                                                                                                                                                                                                                                                                                                                                                                                                                                                                                                                                                                                                                                         | 19% (210)   |
| Very likely                                                                                                                                                                                                                                                                                                                                                                                                                                                                                                                                                                                                                                                                                                                                                                                                                                                                                                                                                                                                                                                                                                                             | 64% (713)   |
| Don't know                                                                                                                                                                                                                                                                                                                                                                                                                                                                                                                                                                                                                                                                                                                                                                                                                                                                                                                                                                                                                                                                                                                              | 4% (42)     |
| <b>Ever used antibiotic PEP*</b>                                                                                                                                                                                                                                                                                                                                                                                                                                                                                                                                                                                                                                                                                                                                                                                                                                                                                                                                                                                                                                                                                                        |             |
| No                                                                                                                                                                                                                                                                                                                                                                                                                                                                                                                                                                                                                                                                                                                                                                                                                                                                                                                                                                                                                                                                                                                                      | 1,109 (92%) |
| Yes <sup>‡‡</sup>                                                                                                                                                                                                                                                                                                                                                                                                                                                                                                                                                                                                                                                                                                                                                                                                                                                                                                                                                                                                                                                                                                                       | 87 (8%)     |
| <p><sup>‡</sup>Includes those identifying as bisexual, straight, or another way. <sup>§</sup>Top two quartiles ("I am comfortable"/"I am very comfortable" from the question, "How would you best describe your current financial situation".</p> <p><sup>‡</sup>Includes crystal methamphetamine, mephedrone or gamma-hydroxybutyrate/gamma-butyrolactone.</p> <p><sup>¶</sup>Includes reporting of: ≥5 condomless anal sex partners, bacterial STI diagnosis, chemsex, and/or meeting partners at sex-on-premises venue, sex party, or cruising location in the last three months (i.e., since August 2023). <sup>††</sup>Based on participant response to statement. *See Appendix Table I for survey questions and preambles. <sup>‡‡</sup>Ever reporting the use of antibiotics after sex for STI prevention. PEP=post-exposure prophylaxis. doxyPEP=doxycycline post-exposure prophylaxis. HIV-PrEP=HIV pre-exposure prophylaxis. PLWHIV=people living with HIV. STI=sexually transmitted infection. SHS=sexual health service. SOP=sex-on-premises. CAS=condomless anal sex. RiiSH='Reducing inequalities in Sexual Health'.</p> |             |

507

508

509 **Figure 1: Knowledge and uptake of antibiotic post-exposure prophylaxis (PEP) among RiiSH 2023 participants (n=1,106)**

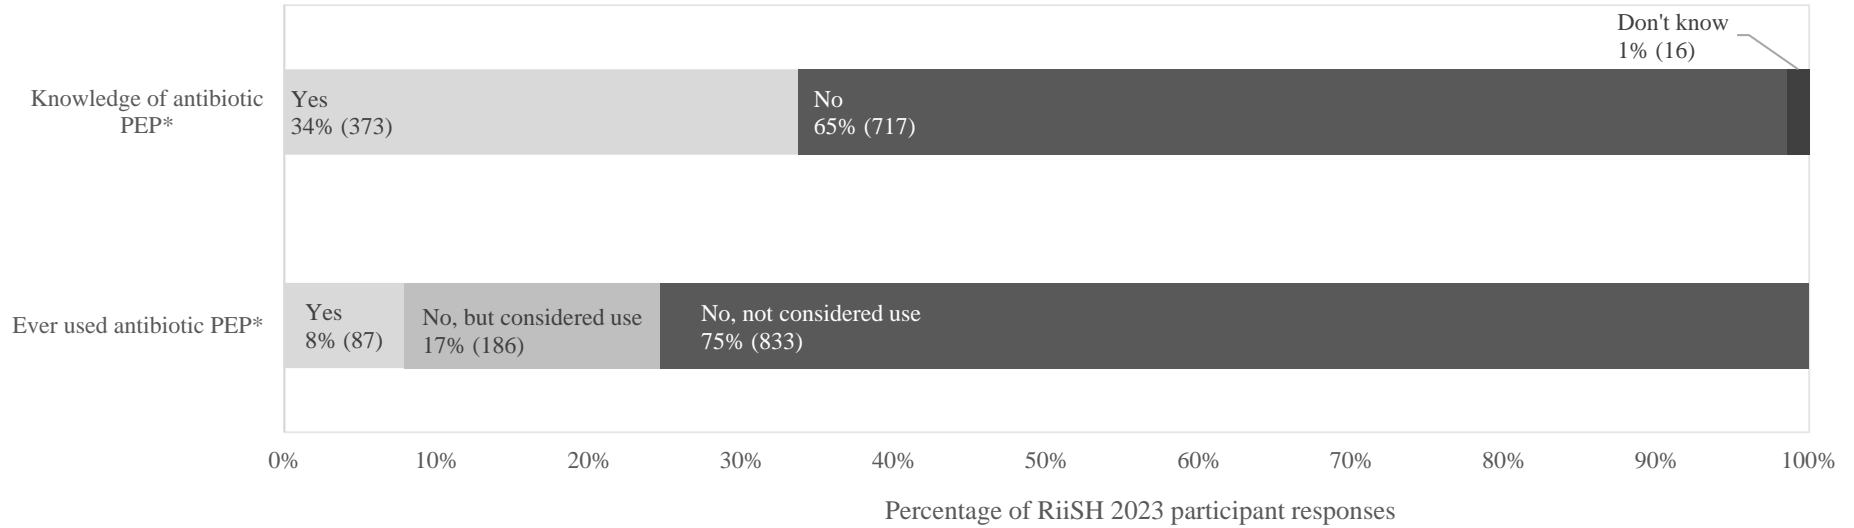

510

511 \*See Appendix I for survey questions and preambles; report of knowledge and use of antibiotics after sex for STI prevention (i.e., antibiotic PEP). PEP=post-  
512 exposure prophylaxis.

513

514 **Table 2. Correlates of ever reporting antibiotic post-exposure prophylaxis (PEP) use for STI prevention among an online community sample of**  
 515 **GBMSM taking part in the RiiSH 2023 survey**

|                                                | Ever used antibiotic PEP <sup>†‡</sup> |                  |         |                  |         |  |
|------------------------------------------------|----------------------------------------|------------------|---------|------------------|---------|--|
|                                                | row % (No.)                            | uOR (95% CI)     | p-value | aOR (95% CI)**   | p-value |  |
| Total                                          | 8% (87)                                |                  |         |                  |         |  |
| Sociodemographic characteristics               |                                        |                  |         |                  |         |  |
| Age at survey completion (interquartile range) | 45 (37-56)                             |                  |         |                  |         |  |
| Age at survey completion (standard deviation)  | 45.7 (10.7)                            |                  |         |                  |         |  |
| Age-group (3 categories)                       |                                        |                  |         |                  |         |  |
| 16-29                                          | 4% (6)                                 | 0.43 (0.18-1.03) |         | 0.53 (0.22-1.29) |         |  |
| 30-44                                          | 8% (34)                                | 0.93 (0.59-1.48) |         | 0.91 (0.57-1.48) |         |  |
| 45 and over                                    | 9% (47)                                | 1.00 (base)      | 0.15    | 1.00 (base)      | 0.33    |  |
| Gender identity and sex at birth               |                                        |                  |         |                  |         |  |
| All other gender identity groups               | 7% (4)                                 | 0.91 (0.32-2.59) |         | ..               |         |  |
| Cisgender male                                 | 8% (83)                                | 1.00 (base)      | 0.87    | ..               |         |  |
| Sexual orientation                             |                                        |                  |         |                  |         |  |
| Gay/homosexual                                 | 8% (77)                                | 1.00 (base)      |         | ..               |         |  |
| Bisexual <sup>‡</sup>                          | 5% (10)                                | 0.58 (0.30-1.15) | 0.11    | ..               |         |  |
| Ethnic group (2 categories)                    |                                        |                  |         |                  |         |  |
| All other ethnic groups                        | 11% (13)                               | 1.47 (0.79-2.73) |         | ..               |         |  |
| White                                          | 8% (74)                                | 1.00 (base)      | 0.22    | ..               |         |  |
| Country of birth                               |                                        |                  |         |                  |         |  |
| Outside of the UK                              | 11% (28)                               | 1.74 (1.09-2.80) |         | 1.65 (1.01-2.70) |         |  |
| UK                                             | 7% (59)                                | 1.00 (base)      | 0.020   | 1.00 (base)      | 0.051   |  |
| Nation of residence                            |                                        |                  |         |                  |         |  |
| Scotland, Wales, or N Ireland                  | 6% (10)                                | 0.72 (0.37-1.43) |         | ..               |         |  |
| England                                        | 8% (77)                                | 1.00 (base)      | 0.35    | ..               |         |  |
| Employment                                     |                                        |                  |         |                  |         |  |
| Not employed                                   | 6% (15)                                | 0.74 (0.42-1.32) |         | ..               |         |  |

|                                                                |          |  |                  |        |  |                         |
|----------------------------------------------------------------|----------|--|------------------|--------|--|-------------------------|
| Current employment (full-time, part-time, self-employed)       | 8% (72)  |  | 1.00 (base)      | 0.31   |  | ..                      |
| Educational qualifications                                     |          |  |                  |        |  |                         |
| Below degree-level                                             | 5% (21)  |  | 0.50 (0.30-0.84) |        |  | 0.58 (0.34-0.97)        |
| Degree-level or higher                                         | 10% (66) |  | 1.00 (base)      | 0.007  |  | 1.00 (base) 0.030       |
| Lives with partner(s)                                          |          |  |                  |        |  |                         |
| No                                                             | 8% (58)  |  | 1.21 (0.76-1.92) |        |  | ..                      |
| Yes                                                            | 7% (29)  |  | 1.00 (base)      | 0.42   |  | ..                      |
| Comfortable financial situation                                |          |  |                  |        |  |                         |
| No                                                             | 7% (48)  |  | 0.85 (0.54-1.31) |        |  | ..                      |
| Yes (top two quartiles)§                                       | 9% (39)  |  | 1.00 (base)      | 0.46   |  | ..                      |
| Clinical and behavioural characteristics                       |          |  |                  |        |  |                         |
| HIV status and HIV-PrEP use history                            |          |  |                  |        |  |                         |
| HIV negative/unknown - No HIV-PrEP use since August 2023       | 2% (12)  |  | 1.00 (base)      |        |  | 1.00 (base)             |
| HIV negative/unknown - HIV-PrEP use since August 2023          | 12% (53) |  | 6.25 (3.29-11.8) |        |  | 4.54 (2.33-8.85)        |
| PLWHIV                                                         | 15% (22) |  | 7.97 (3.84-16.5) | <0.001 |  | 6.00 (2.81-12.8) <0.001 |
| Recreational drug use associated with chemsex in the last year |          |  |                  |        |  |                         |
| No                                                             | 7% (67)  |  | 1.00 (base)      |        |  | ..                      |
| Yes‡                                                           | 26% (20) |  | 5.13 (2.91-9.05) | <0.001 |  | ..                      |
| Bacterial STI diagnosis since August 2023                      |          |  |                  |        |  |                         |
| No                                                             | 7% (69)  |  | 1.00 (base)      |        |  | ..                      |
| Yes                                                            | 19% (18) |  | 3.15 (1.78-5.55) | <0.001 |  | ..                      |
| SHS visit since December 2022 (last year)                      |          |  |                  |        |  |                         |
| No                                                             | 5% (23)  |  | 1.00 (base)      |        |  | 1.00 (base)             |
| Yes                                                            | 10% (64) |  | 2.17 (1.33-3.58) | 0.001  |  | 1.47 (0.87-2.49) 0.14   |
| Mpox vaccination history (≥1 dose)                             |          |  |                  |        |  |                         |
| No                                                             | 4% (28)  |  | 1.00 (base)      |        |  | 1.00 (base)             |
| Yes                                                            | 13% (59) |  | 3.12 (1.95-4.97) | <0.001 |  | 2.24 (1.37-3.66) 0.001  |
| "Very likely" to consider 4CMenB uptake (i.e. 4CMenB ITU)      |          |  |                  |        |  |                         |
| No                                                             | 4% (17)  |  | 1.00 (base)      |        |  | 1.00 (base)             |
| Yes                                                            | 10% (70) |  | 2.41 (1.40-4.15) | 0.001  |  | 1.97 (1.12-3.46) 0.013  |
| Partnerships since August 2023                                 |          |  |                  |        |  |                         |
| Any new male physical sex partner(s)                           |          |  |                  |        |  |                         |



|                                                                                |          |  |                  |        |  |                         |
|--------------------------------------------------------------------------------|----------|--|------------------|--------|--|-------------------------|
| No new partners                                                                | 5% (19)  |  | 0.58 (0.34-0.98) |        |  | ..                      |
| 1 or more new partners                                                         | 9% (68)  |  | 1.00 (base)      | 0.039  |  | ..                      |
| Met male physical sex partner(s) at SOP venue, sex party, or cruising location |          |  |                  |        |  |                         |
| No                                                                             | 6% (60)  |  | 1.00 (base)      |        |  | ..                      |
| Yes                                                                            | 17% (27) |  | 2.97 (1.82-4.85) | <0.001 |  | ..                      |
| Five or more male condomless anal sex partners                                 |          |  |                  |        |  |                         |
| No                                                                             | 5% (42)  |  | 1.00 (base)      |        |  | ..                      |
| Yes                                                                            | 19% (45) |  | 4.80 (3.06-7.52) | <0.001 |  | ..                      |
| Markers of sexual risk in the last 3 months (composite)*                       |          |  |                  |        |  |                         |
| No                                                                             | 5% (37)  |  | 1.00 (base)      |        |  | 1.00 (base)             |
| Yes                                                                            | 14% (65) |  | 3.08 (1.97-4.80) | <0.001 |  | 2.84 (1.81-4.47) <0.001 |
|                                                                                |          |  |                  |        |  |                         |
| Personal well-being measures                                                   |          |  |                  |        |  |                         |
| Low life satisfaction                                                          |          |  |                  |        |  |                         |
| No                                                                             | 8% (68)  |  | 1.00 (base)      |        |  | ..                      |
| Yes                                                                            | 8% (19)  |  | 0.99 (0.59-1.69) | 0.98   |  | ..                      |
| Not specified                                                                  | 0% (0)   |  |                  |        |  |                         |
| Low life worthwhileness                                                        |          |  |                  |        |  |                         |
| No                                                                             | 7% (66)  |  | 1.00 (base)      |        |  | ..                      |
| Yes                                                                            | 10% (21) |  | 1.33 (0.80-2.23) | 0.27   |  | ..                      |
| Not specified                                                                  | 0% (0)   |  |                  |        |  |                         |
| Low happiness (yesterday)                                                      |          |  |                  |        |  |                         |
| No                                                                             | 8% (67)  |  | 1.00 (base)      |        |  | ..                      |
| Yes                                                                            | 8% (20)  |  | 1.02 (0.60-1.71) | 0.95   |  | ..                      |
| Not specified                                                                  | 0% (0)   |  |                  |        |  |                         |
| High anxiety (yesterday)                                                       |          |  |                  |        |  |                         |
| No                                                                             | 9% (61)  |  | 1.00 (base)      |        |  | ..                      |
| Yes                                                                            | 6% (26)  |  | 0.71 (0.44-1.14) | 0.15   |  | ..                      |
| Not specified                                                                  | 0% (0)   |  |                  |        |  |                         |
|                                                                                |          |  |                  |        |  |                         |
| Sexual satisfaction                                                            |          |  |                  |        |  |                         |
| "I feel satisfied with my sex life"††                                          |          |  |                  |        |  |                         |
| Disagree/do not agree nor disagree                                             | 6% (41)  |  | 1.00 (base)      |        |  | 1.00 (base)             |
| Agree/strongly agree                                                           | 10% (46) |  | 1.64 (1.06-2.54) | 0.027  |  | 1.36 (0.86-2.13) 0.19   |

|                                                                                                                                                                                                                                                                                                                                                                                                                                                                                                                                                                                                                                                                                                                                                                                                                                                                                                                                                                                                                                                                                                                                                                                                          |  |  |  |  |  |  |
|----------------------------------------------------------------------------------------------------------------------------------------------------------------------------------------------------------------------------------------------------------------------------------------------------------------------------------------------------------------------------------------------------------------------------------------------------------------------------------------------------------------------------------------------------------------------------------------------------------------------------------------------------------------------------------------------------------------------------------------------------------------------------------------------------------------------------------------------------------------------------------------------------------------------------------------------------------------------------------------------------------------------------------------------------------------------------------------------------------------------------------------------------------------------------------------------------------|--|--|--|--|--|--|
|                                                                                                                                                                                                                                                                                                                                                                                                                                                                                                                                                                                                                                                                                                                                                                                                                                                                                                                                                                                                                                                                                                                                                                                                          |  |  |  |  |  |  |
| <p>‡Includes those identifying as bisexual, straight, or another way. §Top two quartiles ("I am comfortable"/"I am very comfortable" from the question, "How would you best describe your current financial situation". †Includes crystal methamphetamine, mephedrone or gamma-hydroxybutyrate/gamma-butyrolactone. ¶Includes reporting of: ≥5 condomless anal sex partners, bacterial STI diagnosis, chemsex, and/or meeting partners at sex-on-premises venue, sex party, or cruising location in the last three months (i.e., since August 2023). ††Based on participant response to statement. *See Appendix Table I for survey questions and preambles. ‡‡Ever reporting the use of antibiotics after sex for STI prevention (i.e., antibiotic PEP). **Adjusted for age-group (a priori selection), country of birth, educational qualifications, markers of sexual risk. uOR=unadjusted odds ratio. aOR=adjusted odds ratio. PEP=post-exposure prophylaxis. HIV-PrEP=HIV pre-exposure prophylaxis. PLWHIV=people living with HIV. STI=sexually transmitted infection. SHS=sexual health service. SOP=sex-on-premises. CAS=condomless anal sex. RiiSH='Reducing inequalities in Sexual Health'.</p> |  |  |  |  |  |  |

516

517

518 **Table 3. Correlates of reporting intention to use doxyPEP (doxyPEP ITU) among an online community sample of GBMSM taking part in the RiSH**  
 519 **2023 survey**

|                                                          | Reporting intention to use doxyPEP (i.e. doxyPEP ITU) <sup>‡‡</sup> |                  |         |                  |         |
|----------------------------------------------------------|---------------------------------------------------------------------|------------------|---------|------------------|---------|
|                                                          | row % (No.)                                                         | uOR (95% CI)     | p-value | aOR (95% CI)**   | p-value |
| Total                                                    | 51% (568)                                                           |                  |         |                  |         |
| Sociodemographic characteristics                         |                                                                     |                  |         |                  |         |
| Age at survey completion (interquartile range)           | 44 (35-54)                                                          |                  |         |                  |         |
| Age at survey completion (standard deviation)            | 44.4 (12.3)                                                         |                  |         |                  |         |
| Age-group (3 categories)                                 |                                                                     |                  |         |                  |         |
| 16-29                                                    | 42% (63)                                                            | 0.66 (0.46-0.95) |         | 0.71 (0.49-1.03) |         |
| 30-44                                                    | 54% (225)                                                           | 1.09 (0.84-1.41) |         | 1.13 (0.87-1.46) |         |
| 45 and over                                              | 52% (280)                                                           | 1.00 (base)      | 0.031   | 1.00 (base)      | 0.059   |
| Gender identity and sex at birth                         |                                                                     |                  |         |                  |         |
| All other gender identity groups                         | 45% (25)                                                            | 0.78 (0.45-1.34) |         | ..               |         |
| Cisgender male                                           | 52% (543)                                                           | 1.00 (base)      | 0.37    | ..               |         |
| Sexual orientation                                       |                                                                     |                  |         |                  |         |
| Gay/homosexual                                           | 51% (467)                                                           | 1.00 (base)      |         | ..               |         |
| Bisexual <sup>‡</sup>                                    | 52% (101)                                                           | 1.01 (0.74-1.37) | 0.96    | ..               |         |
| Ethnic group (2 categories)                              |                                                                     |                  |         |                  |         |
| All other ethnic groups                                  | 53% (65)                                                            | 1.09 (0.75-1.59) |         | ..               |         |
| White                                                    | 51% (503)                                                           | 1.00 (base)      | 0.65    | ..               |         |
| Country of birth                                         |                                                                     |                  |         |                  |         |
| Outside of the UK                                        | 54% (134)                                                           | 1.17 (0.88-1.56) |         | ..               |         |
| UK                                                       | 50% (434)                                                           | 1.00 (base)      | 0.27    | ..               |         |
| Nation of residence                                      |                                                                     |                  |         |                  |         |
| Scotland, Wales, or N Ireland                            | 52% (85)                                                            | 1.01 (0.72-1.40) |         | ..               |         |
| England                                                  | 51% (483)                                                           | 1.00 (base)      | 0.96    | ..               |         |
| Employment                                               |                                                                     |                  |         |                  |         |
| Not employed                                             | 47% (113)                                                           | 0.82 (0.62-1.09) |         | ..               |         |
| Current employment (full-time, part-time, self-employed) | 52% (455)                                                           | 1.00 (base)      | 0.18    | ..               |         |

|                                                                |           |                  |        |  |  |                          |
|----------------------------------------------------------------|-----------|------------------|--------|--|--|--------------------------|
| Educational qualifications                                     |           |                  |        |  |  |                          |
| Below degree-level                                             | 52% (215) | 1.03 (0.81-1.31) |        |  |  | ..                       |
| Degree-level or higher                                         | 51% (353) | 1.00 (base)      | 0.82   |  |  | ..                       |
| Lives with partner(s)                                          |           |                  |        |  |  |                          |
| No                                                             | 49% (343) | 0.82 (0.64-1.05) |        |  |  | ..                       |
| Yes                                                            | 54% (225) | 1.00 (base)      | 0.11   |  |  | ..                       |
| Comfortable financial situation                                |           |                  |        |  |  |                          |
| No                                                             | 50% (328) | 0.90 (0.71-1.15) |        |  |  | ..                       |
| Yes (top two quartiles)§                                       | 53% (240) | 1.00 (base)      | 0.40   |  |  | ..                       |
| Clinical and behavioural characteristics                       |           |                  |        |  |  |                          |
| HIV status and HIV-PrEP use history                            |           |                  |        |  |  |                          |
| HIV negative/unknown - No HIV-PrEP use since August 2023       | 45% (242) | 1.00 (base)      |        |  |  | 1.00 (base)              |
| HIV negative/unknown - HIV-PrEP use since August 2023          | 56% (238) | 1.56 (1.21-2.01) |        |  |  | 1.40 (1.17-1.84)         |
| PLWHIV                                                         | 21% (88)  | 1.96 (1.34-2.85) | <0.001 |  |  | 1.74 (1.28-2.57) 0.006   |
| Recreational drug use associated with chemsex in the last year |           |                  |        |  |  |                          |
| No                                                             | 51% (524) | 1.00 (base)      |        |  |  | ..                       |
| Yes‡                                                           | 58% (44)  | 1.33 (0.83-2.13) | 0.24   |  |  | ..                       |
| Bacterial STI diagnosis since August 2023                      |           |                  |        |  |  |                          |
| No                                                             | 50% (501) | 1.00 (base)      |        |  |  | ..                       |
| Yes                                                            | 70% (67)  | 2.35 (1.49-3.69) | <0.001 |  |  | ..                       |
| SHS visit since December 2022 (last year)                      |           |                  |        |  |  |                          |
| No                                                             | 43% (202) | 1.00 (base)      |        |  |  | 1.00 (base)              |
| Yes                                                            | 58% (366) | 1.80 (1.41-2.29) | <0.001 |  |  | 1.66 (1.29-2.14) <0.001  |
| Mpox vaccination history (≥1 dose)                             |           |                  |        |  |  |                          |
| No                                                             | 48% (303) | 1.00 (base)      |        |  |  | 1.00 (base)              |
| Yes                                                            | 56% (265) | 1.42 (1.12-1.81) | 0.004  |  |  | 1.28 (1.10-1.64) 0.054   |
| "Very likely" to consider 4CMenB uptake (i.e. 4CMenB ITU)      |           |                  |        |  |  |                          |
| No                                                             | 21% (81)  | 1.00 (base)      |        |  |  | 1.00 (base)              |
| Yes                                                            | 68% (487) | 8.30 (6.21-11.1) | <0.001 |  |  | 8.82 (6.62-11.93) <0.001 |
| Partnerships since August 2023                                 |           |                  |        |  |  |                          |
| Any new male physical sex partner(s)                           |           |                  |        |  |  |                          |
| No new partners                                                | 46% (162) | 0.74 (0.57-0.95) |        |  |  | ..                       |

|                                                                                |           |                  |        |                  |        |
|--------------------------------------------------------------------------------|-----------|------------------|--------|------------------|--------|
| 1 or more new partners                                                         | 54% (406) | 1.00 (base)      | 0.018  | ..               |        |
| Met male physical sex partner(s) at SOP venue, sex party, or cruising location |           |                  |        |                  |        |
| No                                                                             | 51% (481) | 1.00 (base)      |        | ..               |        |
| Yes                                                                            | 54% (87)  | 1.13 (0.81-1.59) | 0.46   | ..               |        |
| Five or more male condomless anal sex partners                                 |           |                  |        |                  |        |
| No                                                                             | 48% (416) | 1.00 (base)      |        | ..               |        |
| Yes                                                                            | 66% (152) | 2.12 (1.57-2.87) | <0.001 | ..               |        |
| Markers of sexual risk in the last 3 months (composite) <sup>¶¶</sup>          |           |                  |        |                  |        |
| No                                                                             | 48% (357) | 1.00 (base)      |        | 1.00 (base)      |        |
| Yes                                                                            | 58% (211) | 1.53 (1.19-1.97) | 0.001  | 1.50 (1.16-1.94) | <0.001 |
|                                                                                |           |                  |        |                  |        |
| Personal well-being measures                                                   |           |                  |        |                  |        |
| Low life satisfaction                                                          |           |                  |        |                  |        |
| No                                                                             | 52% (445) | 1.00 (base)      |        | ..               |        |
| Yes                                                                            | 50% (121) | 0.94 (0.70-1.25) | 0.35   | ..               |        |
| Not specified                                                                  | 100% (2)  |                  |        |                  |        |
| Low life worthwhileness                                                        |           |                  |        |                  |        |
| No                                                                             | 51% (453) | 1.00 (base)      |        | ..               |        |
| Yes                                                                            | 52% (113) | 1.04 (0.77-1.40) | 0.37   | ..               |        |
| Not specified                                                                  | 100% (2)  |                  |        |                  |        |
| Low happiness (yesterday)                                                      |           |                  |        |                  |        |
| No                                                                             | 51% (435) | 1.00 (base)      |        | ..               |        |
| Yes                                                                            | 52% (131) | 1.05 (0.79-1.39) | 0.37   | ..               |        |
| Not specified                                                                  | 100% (2)  |                  |        |                  |        |
| High anxiety (yesterday)                                                       |           |                  |        |                  |        |
| No                                                                             | 54% (372) | 1.00             |        | 1.00 (1.00)      |        |
| Yes                                                                            | 47% (194) | 0.78 (0.61-1.00) | 0.057  | 0.77 (0.80-0.99) | 0.040  |
| Not specified                                                                  | 100% (2)  |                  |        |                  |        |
|                                                                                |           |                  |        |                  |        |
| Sexual satisfaction                                                            |           |                  |        |                  |        |
| "I feel satisfied with my sex life" <sup>††</sup>                              |           |                  |        |                  |        |
| Disagree/do not agree nor disagree                                             | 51% (327) | 1.00             |        | ..               |        |
| Agree/strongly agree                                                           | 52% (241) | 1.07 (0.88-1.20) | 0.56   | ..               |        |

‡Includes those identifying as bisexual, straight, or another way. §Top two quartiles ("I am comfortable"/"I am very comfortable" from the question, "How would you best describe your current financial situation". †Includes crystal methamphetamine, mephedrone or gamma-hydroxybutyrate/gamma-butyrolactone. ¶Includes reporting of: ≥5 condomless anal sex partners, bacterial STI diagnosis, chemsex, and/or meeting partners at sex-on-premises venue, sex party, or cruising location in the last three months (i.e., since August 2023). ††Based on participant response to statement. \*See Appendix Table I for survey questions and preambles. ‡‡Participants 'very likely' to consider doxyPEP uptake (See Appendix Table 1 for survey questions and preambles). \*\*Adjusted for age-group (a priori selection), markers of sexual risk. uOR=unadjusted odds ratio. aOR=adjusted odds ratio. PEP=post-exposure prophylaxis. doxyPEP=doxycycline post-exposure prophylaxis. HIV-PrEP=HIV pre-exposure prophylaxis. PLWHIV=people living with HIV. STI=sexually transmitted infection. SHS=sexual health service. SOP=sex-on-premises. CAS=condomless anal sex. RiiSH='Reducing inequalities in Sexual Health'.

520

521



522 **Table 4. Correlates of reporting intention to use 4CMenB (4CMenB ITU) among an online community sample of GBMSM taking part in the RiISH**  
 523 **2023 survey**

|                                                | Reporting intention to use 4CMenB (i.e. 4CMenB ITU)¶¶ |                  |         |                  |         |
|------------------------------------------------|-------------------------------------------------------|------------------|---------|------------------|---------|
|                                                | row % (No.)                                           | uOR (95% CI)     | p-value | aOR (95% CI)**   | p-value |
| Total                                          | 64% (713)                                             |                  |         |                  |         |
| Sociodemographic characteristics               |                                                       |                  |         |                  |         |
| Age at survey completion (interquartile range) | 42 (34-52)                                            |                  |         |                  |         |
| Age at survey completion (standard deviation)  | 42.8 (12.2)                                           |                  |         |                  |         |
| Age-group (3 categories)                       |                                                       |                  |         |                  |         |
| 16-29                                          | 69% (104)                                             | 1.60 (1.09-2.35) |         | 2.16 (1.44-3.25) |         |
| 30-44                                          | 71% (296)                                             | 1.78 (1.36-2.34) |         | 1.84 (1.39-2.45) |         |
| 45 and over                                    | 58% (313)                                             | 1.00 (base)      | <0.001  | 1.00 (base)      | <0.001  |
| Gender identity and sex at birth               |                                                       |                  |         |                  |         |
| All other gender identity groups               | 67% (37)                                              | 1.14 (0.64-2.03) |         | ..               |         |
| Cisgender male                                 | 64% (676)                                             | 1.00 (base)      | 0.66    | ..               |         |
| Sexual orientation                             |                                                       |                  |         |                  |         |
| Gay/homosexual                                 | 66% (605)                                             | 1.00 (base)      |         | 1.00 (base)      |         |
| Bisexual‡                                      | 55% (108)                                             | 0.62 (0.45-0.85) | 0.003   | 0.62 (0.45-0.86) | 0.0044  |
| Ethnic group (2 categories)                    |                                                       |                  |         |                  |         |
| All other ethnic groups                        | 66% (80)                                              | 1.06 (0.71-1.57) |         | ..               |         |
| White                                          | 64% (633)                                             | 1.00 (base)      | 0.79    | ..               |         |
| Country of birth                               |                                                       |                  |         |                  |         |
| Outside of the UK                              | 69% (170)                                             | 1.31 (0.96-1.77) |         | ..               |         |
| UK                                             | 63% (543)                                             | 1.00 (base)      | 0.085   | ..               |         |
| Nation of residence                            |                                                       |                  |         |                  |         |
| Scotland, Wales, or N Ireland                  | 65% (107)                                             | 1.02 (0.72-1.44) |         | ..               |         |
| England                                        | 64% (606)                                             | 1.00 (base)      | 0.91    | ..               |         |
| Employment                                     |                                                       |                  |         |                  |         |

|                                                                |           |                   |        |                  |        |
|----------------------------------------------------------------|-----------|-------------------|--------|------------------|--------|
| Not employed                                                   | 59% (140) | 0.74 (0.55-0.99)  |        | 0.85 (0.62-1.15) |        |
| Current employment (full-time, part-time, self-employed)       | 66% (573) | 1.00 (base)       | 0.040  | 1.00 (base)      | 0.29   |
| Educational qualifications                                     |           |                   |        |                  |        |
| Below degree-level                                             | 55% (230) | 0.54 (0.42-0.69)  |        | 0.57 (0.44-0.73) |        |
| Degree-level or higher                                         | 70% (483) | 1.00 (base)       | <0.001 | 1.00 (base)      | <0.001 |
| Lives with partner(s)                                          |           |                   |        |                  |        |
| No                                                             | 65% (448) | 1.02 (0.79-1.32)  |        | ..               |        |
| Yes                                                            | 64% (265) | 1.00 (base)       | 0.87   | ..               |        |
| Comfortable financial situation                                |           |                   |        |                  |        |
| No                                                             | 63% (411) | 0.86 (0.67-1.10)  |        | ..               |        |
| Yes (top two quartiles)§                                       | 67% (302) | 1.00 (base)       | 0.23   | ..               |        |
| Clinical and behavioural characteristics                       |           |                   |        |                  |        |
| HIV status and HIV-PrEP use history                            |           |                   |        |                  |        |
| HIV negative/unknown - No HIV-PrEP use since August 2023       | 54% (289) | 1.00 (base)       |        | 1.00 (base)      |        |
| HIV negative/unknown - HIV-PrEP use since August 2023          | 76% (323) | 2.73 (2.06-3.61)  |        | 2.26 (1.67-3.05) |        |
| PLWHIV                                                         | 71% (101) | 2.07 (1.39-3.08)  | <0.001 | 1.96 (1.28-2.99) | <0.001 |
| Recreational drug use associated with chemsex in the last year |           |                   |        |                  |        |
| No                                                             | 63% (652) | 1.00 (base)       |        | ..               |        |
| Yes‡                                                           | 80% (61)  | 2.36 (1.32-4.21)  | 0.003  | ..               |        |
| Bacterial STI diagnosis since August 2023                      |           |                   |        |                  |        |
| No                                                             | 63% (635) | 1.00 (base)       |        | ..               |        |
| Yes                                                            | 81% (78)  | 2.56 (1.51-4.34)  | <0.001 | ..               |        |
| SHS visit since December 2022 (last year)                      |           |                   |        |                  |        |
| No                                                             | 50% (236) | 1.00 (base)       |        | 1.00 (base)      |        |
| Yes                                                            | 75% (477) | 2.97 (2.30-3.84)  | <0.001 | 2.45 (1.87-3.21) | <0.001 |
| Mpox vaccination history (≥1 dose)                             |           |                   |        |                  |        |
| No                                                             | 55% (347) | 1.00 (base)       |        | 1.00 (base)      |        |
| Yes                                                            | 78% (366) | 2.93 (2.24-3.83)  | <0.001 | 2.38 (1.79-3.16) | <0.001 |
| "Very likely" to consider doxyPEP uptake (i.e. doxyPEP ITU)    |           |                   |        |                  |        |
| No                                                             | 32% (226) | 1.00 (base)       |        | 1.00 (base)      |        |
| Yes                                                            | 68% (487) | 8.30 (6.21-11.10) | <0.001 | 10.1 (7.33-13.8) | <0.001 |
| Ever used antibiotic PEP‡‡                                     |           |                   |        |                  |        |
| No                                                             | 63% (643) | 1.00 (base)       |        | 1.00 (base)      |        |

|                                                                                |           |                  |        |                  |        |
|--------------------------------------------------------------------------------|-----------|------------------|--------|------------------|--------|
| Yes                                                                            | 80% (70)  | 2.41 (1.40-4.15) | <0.001 | 1.99 (1.13-3.50) | 0.013  |
| Partnerships since August 2023                                                 |           |                  |        |                  |        |
| Any new male physical sex partner(s)                                           |           |                  |        |                  |        |
| No new partners                                                                | 54% (188) | 0.51 (0.39-0.66) |        | ..               |        |
| 1 or more new partners                                                         | 70% (525) | 1.00 (base)      | <0.001 | ..               |        |
| Met male physical sex partner(s) at SOP venue, sex party, or cruising location |           |                  |        |                  |        |
| No                                                                             | 54% (188) | 1.00 (base)      |        | ..               |        |
| Yes                                                                            | 70% (525) | 1.26 (0.88-1.81) | <0.001 | ..               |        |
| Five or more male condomless anal sex partners                                 |           |                  |        |                  |        |
| No                                                                             | 60% (524) | 1.00 (base)      |        | ..               |        |
| Yes                                                                            | 82% (189) | 3.01 (2.10-4.32) | <0.001 | ..               |        |
| Markers of sexual risk in the last 3 months (composite)*                       |           |                  |        |                  |        |
| No                                                                             | 59% (443) | 1.00 (base)      |        | 1.00 (base)      |        |
| Yes                                                                            | 75% (270) | 2.02 (1.53-2.67) | <0.001 | 2.09 (1.56-2.79) | <0.001 |
| Personal well-being measures                                                   |           |                  |        |                  |        |
| Low life satisfaction                                                          |           |                  |        |                  |        |
| No                                                                             | 65% (560) | 1.00 (base)      |        | ..               |        |
| Yes                                                                            | 63% (152) | 0.91 (0.68-1.22) | 0.75   | ..               |        |
| Not specified                                                                  | 50% (1)   |                  |        |                  |        |
| Low life worthwhileness                                                        |           |                  |        |                  |        |
| No                                                                             | 65% (579) | 1.00 (base)      |        | ..               |        |
| Yes                                                                            | 61% (133) | 0.84 (0.62-1.14) | 0.50   | ..               |        |
| Not specified                                                                  | 50% (1)   |                  |        |                  |        |
| Low happiness (yesterday)                                                      |           |                  |        |                  |        |
| No                                                                             | 65% (551) | 1.00 (base)      |        | ..               |        |
| Yes                                                                            | 64% (161) | 0.98 (0.73-1.32) | 0.90   | ..               |        |
| Not specified                                                                  | 50% (1)   |                  |        |                  |        |
| High anxiety (yesterday)                                                       |           |                  |        |                  |        |
| No                                                                             | 64% (442) | 1.00 (base)      |        | ..               |        |
| Yes                                                                            | 66% (270) | 1.11 (0.86-1.44) | 0.66   | ..               |        |
| Not specified                                                                  | 50% (1)   |                  |        |                  |        |

|                                                   |           |  |                  |      |  |    |
|---------------------------------------------------|-----------|--|------------------|------|--|----|
| Sexual satisfaction                               |           |  |                  |      |  |    |
| "I feel satisfied with my sex life" <sup>††</sup> |           |  |                  |      |  |    |
| Disagree/do not agree nor disagree                | 63% (404) |  | 1.00 (base)      |      |  | .. |
| Agree/strongly agree                              | 67% (309) |  | 1.23 (0.95-1.58) | 0.11 |  | .. |

<sup>‡</sup>Includes those identifying as bisexual, straight, or another way. <sup>§</sup>Top two quartiles ("I am comfortable"/"I am very comfortable" from the question, "How would you best describe your current financial situation". <sup>‡</sup>Includes crystal methamphetamine, mephedrone or gamma-hydroxybutyrate/gamma-butyrolactone. <sup>‡‡</sup>Ever reporting the use of antibiotics after sex for STI prevention (i.e., antibiotic PEP). <sup>¶</sup>Includes reporting of:  $\geq 5$  condomless anal sex partners, bacterial STI diagnosis, chemsex, and/or meeting partners at sex-on-premises venue, sex party, or cruising location in the last three months (i.e., since August 2023). <sup>††</sup>Based on participant response to statement. \*See Appendix Table I for survey questions and preambles. <sup>¶¶</sup>Participants 'very likely' to consider 4CMenB uptake (See Appendix Table 1 for survey questions and preambles). \*\*Adjusted for age-group (a priori selection), sexual orientation, employment status, educational qualifications, markers of sexual risk. uOR=unadjusted odds ratio. aOR=adjusted odds ratio. PEP=post-exposure prophylaxis. doxyPEP=doxycycline post-exposure prophylaxis. HIV-PrEP=HIV pre-exposure prophylaxis. PLWHIV=people living with HIV. STI=sexually transmitted infection. SHS=sexual health service. SOP=sex-on-premises. CAS=condomless anal sex. RiSH='Reducing inequalities in Sexual Health'.
