# Supplementary material for: Knowledge, uptake and intention to use antibiotic post-exposure prophylaxis and meningococcal B vaccine (4CMenB) for gonorrhoea among a large, online community sample of gay, bisexual and other men who have sex with men in the UK
Source: bioRxiv or medRxiv preprint supplement (doi:10.1101/2024.07.08.24310063), 2024-07-08
Supplement: Supplementary file [file media-1.pdf]

1 **Supporting information**

2 Appendix I. Excerpt of RiiSH 2023 survey questions and preambles used for study outcome measures

3 Appendix II: RiiSH 2023 participant flowchart

4

5 Appendix III: Antibiotic regimens ever used as antibiotic post-exposure prophylaxis (PEP) among  
6 RiiSH 2023 participants

7

8 Appendix I. Excerpt of RiiSH 2023 survey questions and preambles  
9 used for study outcome measures

10

11 **Excerpt 1: Questions assessing STI prophylaxis knowledge and use**

12

13 **(Preamble)**

14 There is growing evidence from research studies that taking an **antibiotic** called doxycycline **after**  
15 **having sex** (i.e. doxycycline post-exposure prophylaxis or doxy PEP) can reduce the chances of  
16 getting some bacterial STIs (i.e. chlamydia, syphilis and gonorrhoea). Using antibiotics in this way is  
17 not currently recommended by clinicians or public health professionals in the UK [click here for  
18 information about **doxy PEP** [DoxyPEP — QueerHealth](#)] and is different than being prescribed  
19 antibiotics to treat an STI that's been diagnosed at a clinic or by testing.

20

21 **(Q49.C)**

22 **Routing: Asked to all participants**

23 Before taking this survey, had you **heard about** using antibiotics immediately **after sex** to prevent  
24 STIs other than HIV (e.g. doxy PEP)?

25

- No
- Yes
- Don't know

28

29 **(Q50. C)**

30 **Routing: Asked to all participants**

31 Have you **ever used** antibiotics in this way?

32

- No
- Yes

34

35 **(Q51. C)**

36 **Routing: Asked to participants who did not report antibiotic use (i.e., Q50C = 'No')**

37 Have you **ever considered** taking antibiotics in this way?

38

- No
- Yes

40

41 **(Q52. C)**

42 **Routing: Asked to participants who did report antibiotic use (i.e., Q50C = 'Yes')**

43 When did you **last use** antibiotics in this way?

44

- Less than one year ago
- One to two years ago
- More than two years ago

47

48 **(Q53. C)**

49 **Routing: Asked to participants who reported antibiotic use less than one year ago (i.e., Q50C =**  
50 **'Yes' & i.e., Q52C = 'Less than one year ago')**

51 Thinking back to the **last** time you used antibiotics in this way, was it:

52

- Before August 2023
- Since the start of August 2023

54

55 **(Q54. C)**

56 **Routing: Asked to participants who did report antibiotic use (i.e., Q50C = 'Yes')**

57 Which antibiotic(s) have you used to **prevent** STIs? [tick all that apply]

58

- Doxycycline (e.g. Vibramycin-D, Efracea, Periostat)

59

- Azithromycin (e.g. Zithromax)

- 60 • Amoxicillin (e.g. Respillin)
- 61 • Metronidazole (e.g. Acea, Anabact, Flagyl, Metrogel, Metroso, Rosiced, Rozex, Vaginyl,
- 62 Zidoval, Zyomet)
- 63 • I don't know
- 64 • Other

65

66 **Excerpt 2: Questions assessing doxyPEP and Bexsero intention to use**

67

68 **(Q55. C)**

69 **Routing: Asked to all participants**

70 **Doxycycline PEP** (doxycycline post-exposure prophylaxis or doxy PEP) would involve taking  
71 antibiotic tablets within 72 hours **after sex** to try and **prevent getting bacterial STIs**. If this was  
72 shown to be safe and effective, **how likely** would you be to take doxy PEP?

- 73 • Very unlikely
- 74 • Somewhat unlikely
- 75 • Somewhat likely
- 76 • Very likely
- 77 • I don't know

78

79 **(Q56. C)**

80 **Routing: Asked to all participants**

81 New research evidence suggests that **Bexsero**, a vaccine that protects against a type of meningitis, can  
82 lower the risk of getting gonorrhoea by 30%-50%. If this vaccine was available at a sexual health  
83 clinic, **how likely** would you consider having it (i.e getting a jab at two different times) to **protect**  
84 yourself from gonorrhoea?

- 85 • Very unlikely
- 86 • Somewhat unlikely
- 87 • Somewhat likely
- 88 • Very likely
- 89 • I don't know

90

91 Appendix II: RiiSH 2023 participant flowchart

92  
93

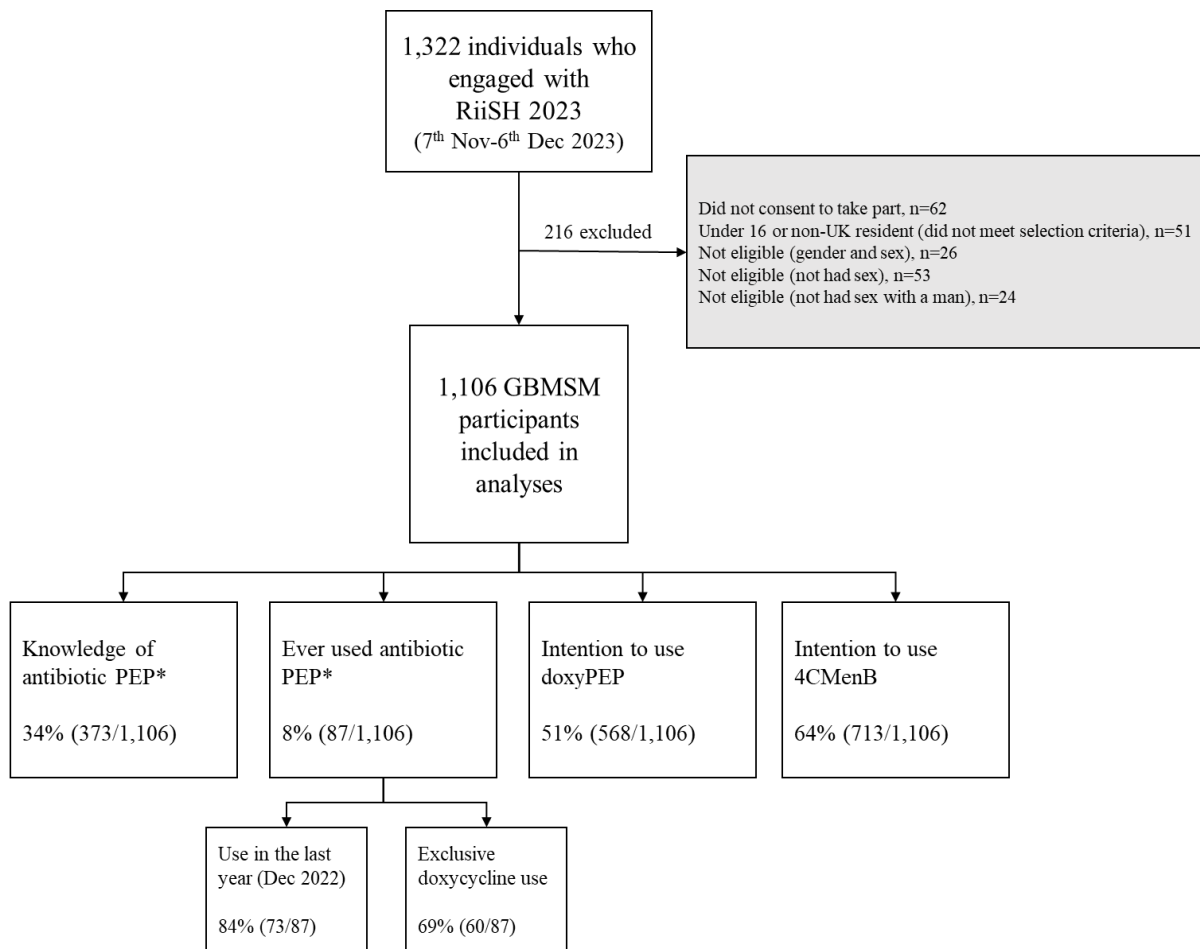

94  
95  
96  
97  
98  
99  
100

\*See Appendix I for survey questions and preambles; report of knowledge and use of antibiotics after sex for STI prevention (i.e., antibiotic PEP). PEP=post-exposure prophylaxis. doxyPEP=doxycycline post-exposure prophylaxis.

101 Appendix III: Antibiotic regimens ever used as antibiotic post-  
 102 exposure prophylaxis (PEP) among RiiSH 2023 participants  
 103  
 104

|                                                       | n (%)     |
|-------------------------------------------------------|-----------|
| RiiSH participants ever reporting antibiotic PEP use* | 87 (100%) |
| Doxycycline only‡                                     | 60 (69%)  |
| Azithromycin only‡                                    | 2 (2%)    |
| Amoxicillin only‡                                     | 7 (8%)    |
| Two or more antibiotics, including doxycycline        | 8 (9%)    |
| Don't know                                            | 10 (11%)  |

\*See Appendix I for survey questions and preambles; report of knowledge and use of antibiotics after sex for STI prevention (i.e., antibiotic PEP). ‡ Exclusive use. PEP=post-exposure prophylaxis. doxyPEP=doxycycline post-exposure prophylaxis.

105
